# Supplementary material for: Biomass waste-derived recyclable heterogeneous catalyst for aqueous aldol reaction and depolymerization of PET waste
Source: Royal Society of Chemistry journal article supplement (doi:10.1039/d1nj03225a), 2021-01-01

## SUPPORTING INFORMATION

**Name of Journal: New Journal of Chemistry**

### **Biomass Waste-Derived Recyclable Heterogeneous Catalyst for Aqueous Aldol Reaction and Depolymerization of PET Waste**

Z.T Laldinpui,<sup>a,b</sup> C. Lalmuanpuia,<sup>a,b</sup> Samson Lalmangaihzuala,<sup>a,b</sup> Vanlalngaihawma Khiangte,<sup>a,b</sup> Zodinpuia Pachuau,<sup>b</sup> K. Vanlaldinpui<sup>a,\*</sup>

a Department of Chemistry, Mizoram University, Pachhunga University College Campus, Aizawl, Mizoram – 796001, India

b Department of Chemistry, Mizoram University, Aizawl, Mizoram – 796004, India

\* Corresponding author: [mapuiakhiangte@gmail.com](mailto:mapuiakhiangte@gmail.com)

---

**Table S1:** XRF Analysis of OPA Catalyst.

| Sl. No | Metal oxides                   | Concentration (%) |
|--------|--------------------------------|-------------------|
| 1      | CaO                            | 31.322            |
| 2      | K <sub>2</sub> O               | 29.38             |
| 3      | SO <sub>3</sub>                | 15.792            |
| 4      | MgO                            | 7.037             |
| 5      | P <sub>2</sub> O <sub>5</sub>  | 5.188             |
| 6      | Fe <sub>2</sub> O <sub>3</sub> | 2.152             |
| 7      | SiO <sub>2</sub>               | 1.115             |
| 8      | MnO                            | 0.268             |
| 9      | CuO                            | 0.201             |
| 10     | Cr <sub>2</sub> O <sub>3</sub> | 0.129             |
| 11     | Al <sub>2</sub> O <sub>3</sub> | 0.123             |
| 12     | Na <sub>2</sub> O              | 0.108             |

**Figure S1: EDX data of fresh OPA**

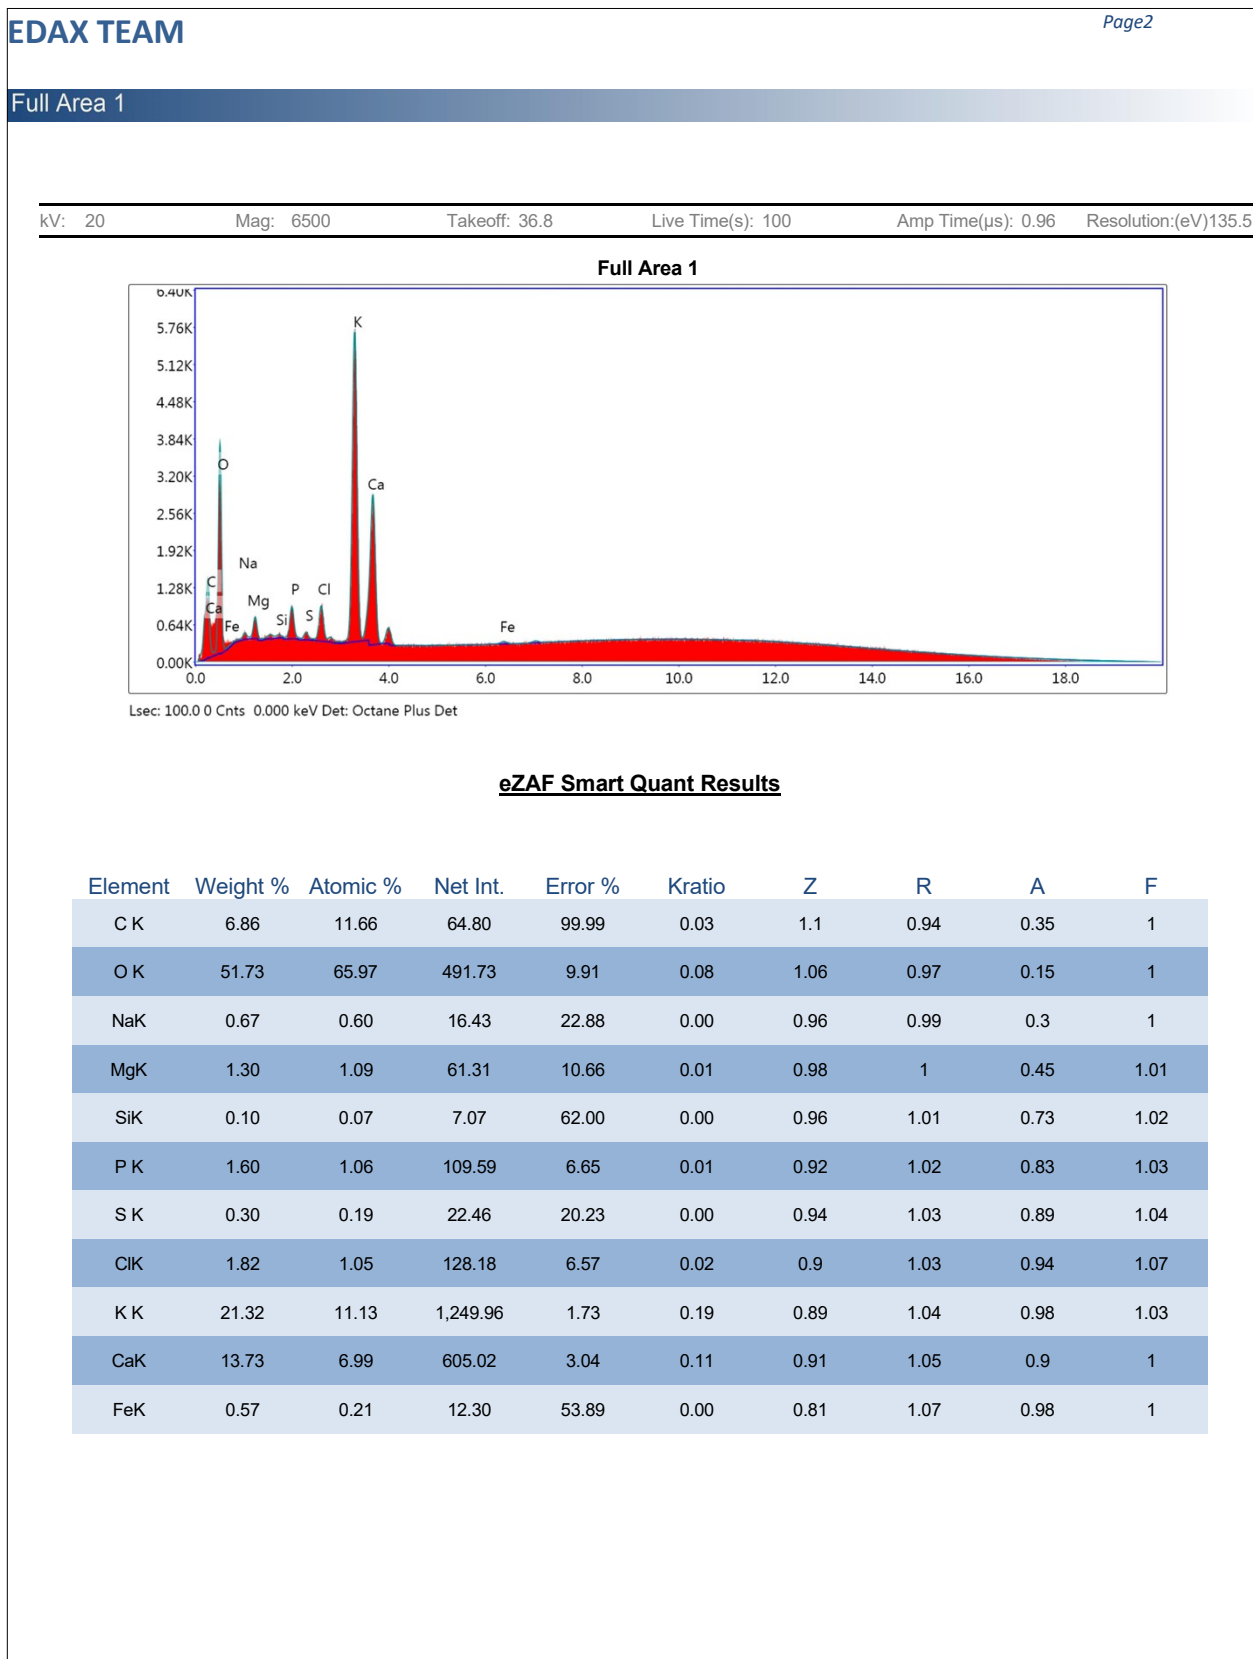

Filename: ...m-Dept-PU-C-Samson-SM-02-2021USAVE.ttd  
 Operator ID: SICART  
 Sample ID: Heterogeneous Catalyst (SM-02)  
 Sample Weight: 11.317 mg  
 Comment: samson talhmanqalizuqala /Dr.K.Vanlalidipua, Dept of Chem,pachhunga Uni College, Aizawal  
 ID No-352/2020-21

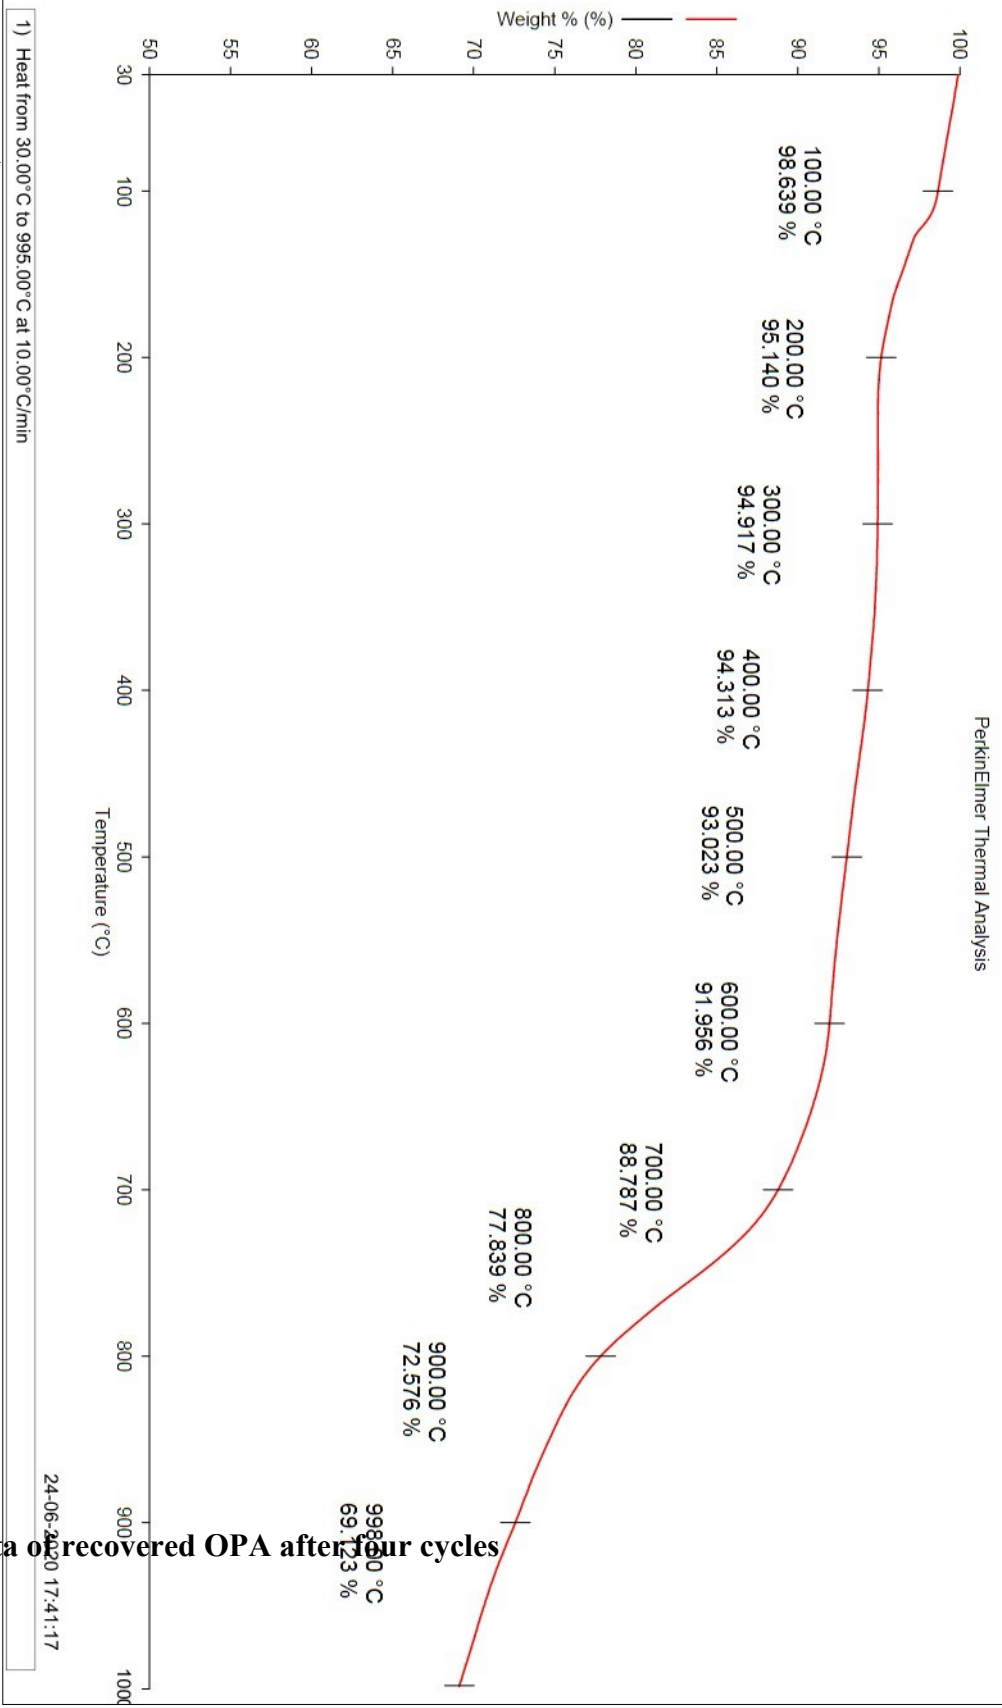

Figure S2: Thermal

Figure S3: EDX data on recovered OPA after four cycles

kV: 20      Mag: 1000      Takeoff: 36.4      Live Time(s): 30      Amp Time(μs): 0.96      Resolution:(eV)135.5

#### Full Area 1

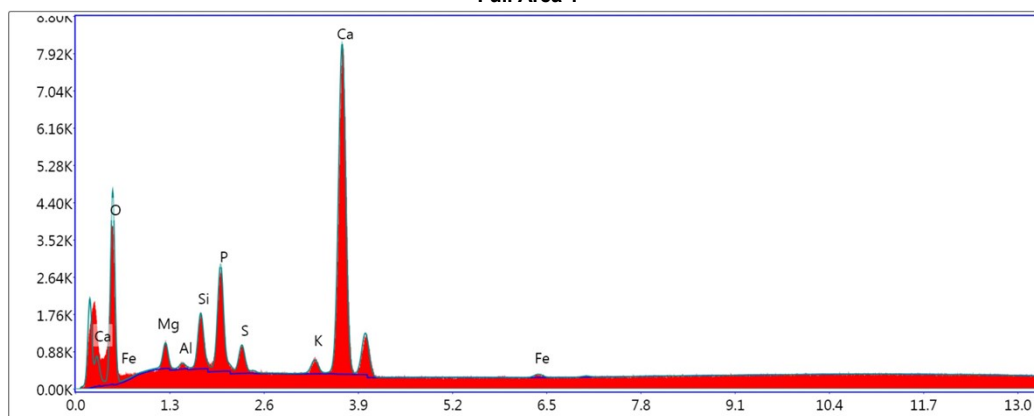

Lsec: 30.0 0 Cnts 0.000 keV Det: Octane Plus Det

#### eZAF Smart Quant Results

| Element | Weight % | Atomic % | Net Int. | Error % | Kratio | Z    | R    | A    | F    |
|---------|----------|----------|----------|---------|--------|------|------|------|------|
| O K     | 53.13    | 72.16    | 2,109.72 | 9.80    | 0.09   | 1.06 | 0.96 | 0.16 | 1    |
| MgK     | 1.85     | 1.65     | 349.86   | 9.34    | 0.01   | 0.98 | 1    | 0.45 | 1.01 |
| AlK     | 0.27     | 0.22     | 65.20    | 25.30   | 0.00   | 0.95 | 1    | 0.58 | 1.01 |
| SiK     | 2.71     | 2.10     | 802.50   | 5.46    | 0.02   | 0.97 | 1.01 | 0.71 | 1.02 |
| P K     | 6.18     | 4.34     | 1,628.71 | 3.97    | 0.05   | 0.93 | 1.02 | 0.79 | 1.02 |
| S K     | 1.53     | 1.04     | 421.28   | 7.52    | 0.01   | 0.95 | 1.02 | 0.82 | 1.03 |
| K K     | 0.98     | 0.54     | 244.49   | 8.95    | 0.01   | 0.9  | 1.04 | 0.96 | 1.12 |
| CaK     | 32.51    | 17.62    | 6,262.06 | 1.69    | 0.29   | 0.92 | 1.04 | 0.97 | 1    |
| FeK     | 0.84     | 0.33     | 73.68    | 30.81   | 0.01   | 0.82 | 1.07 | 0.98 | 1    |

Figure S4 (a): SEM image of the recovered OPA

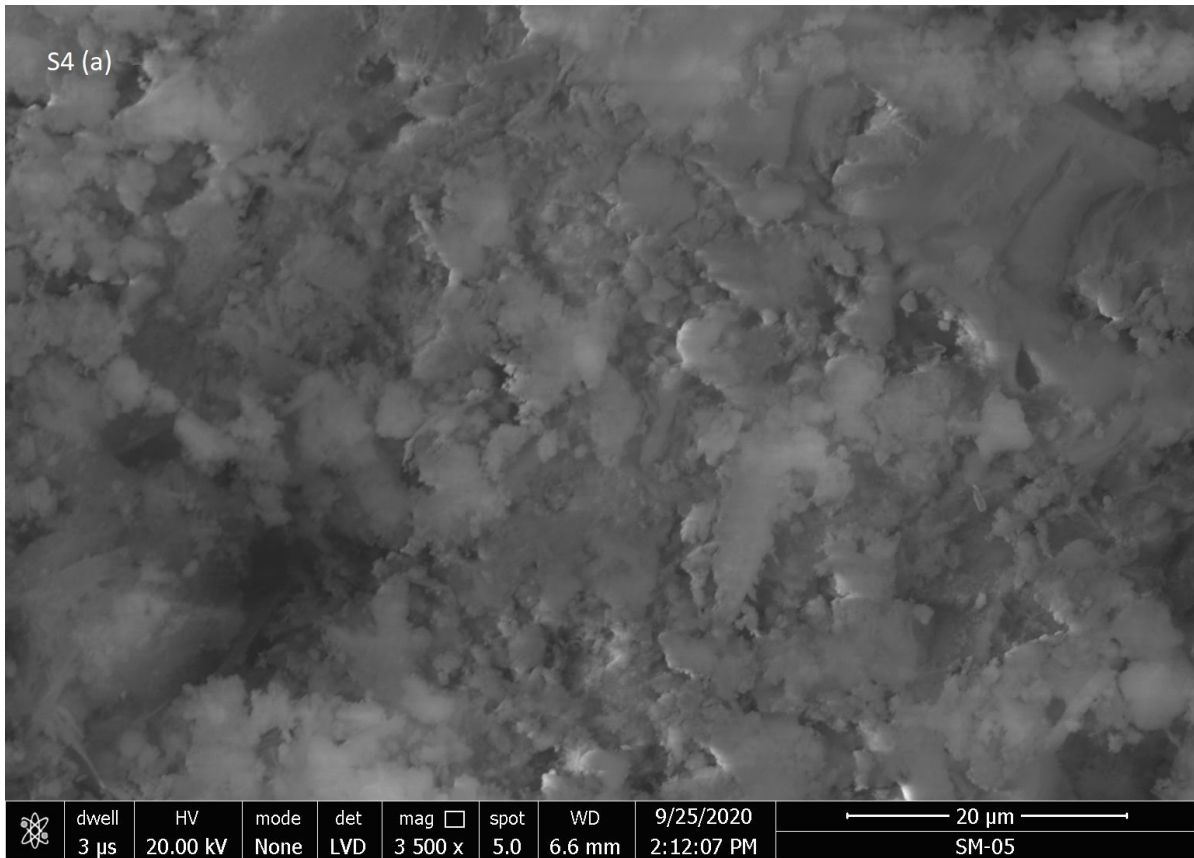

**Figure S4 (b): SEM image of the recovered OPA**

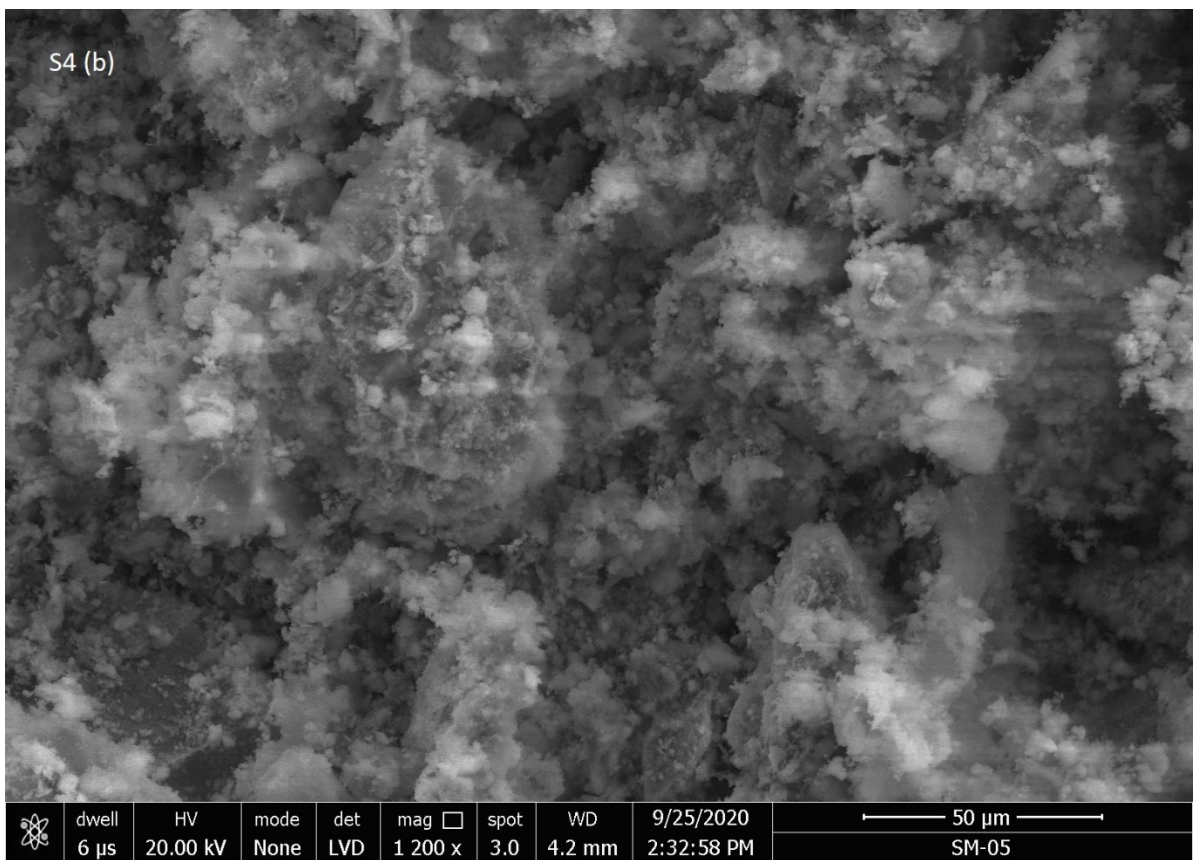

**Figure S4 (c): SEM image of the recovered OPA**

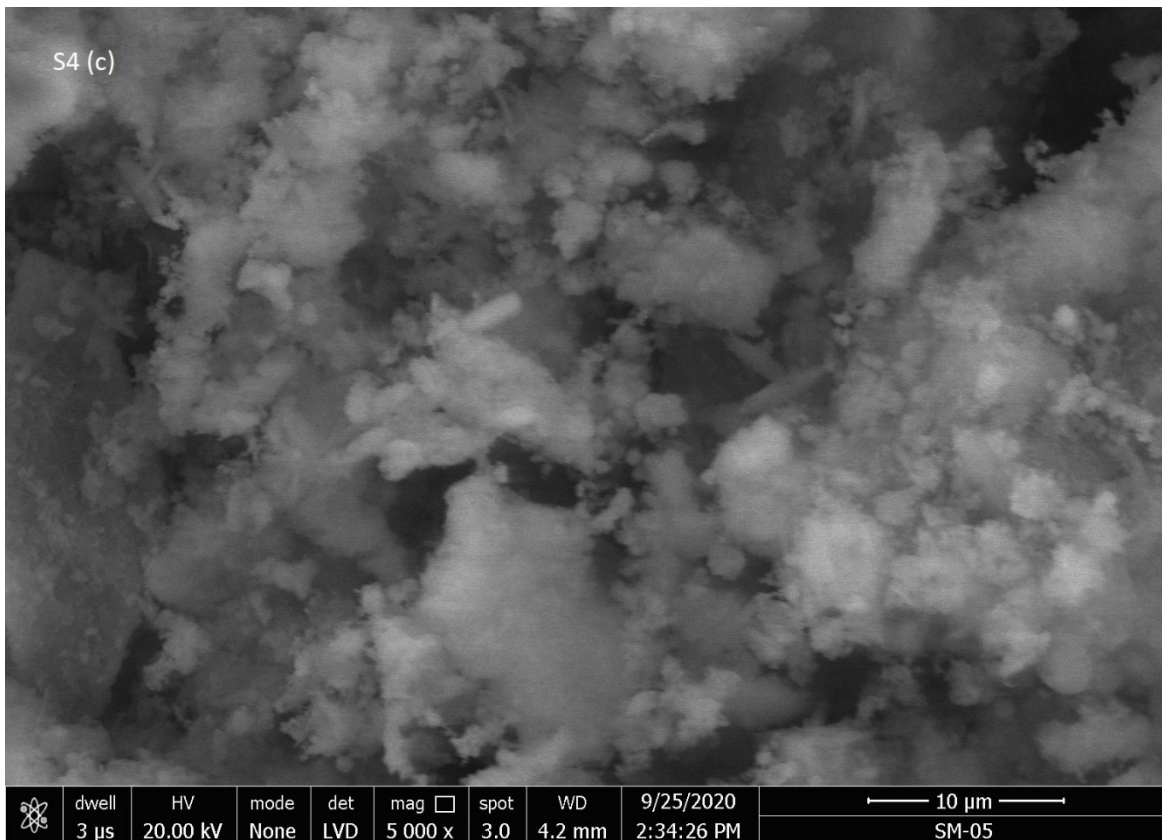

**Figure S4 (d): SEM image of the recovered OPA**

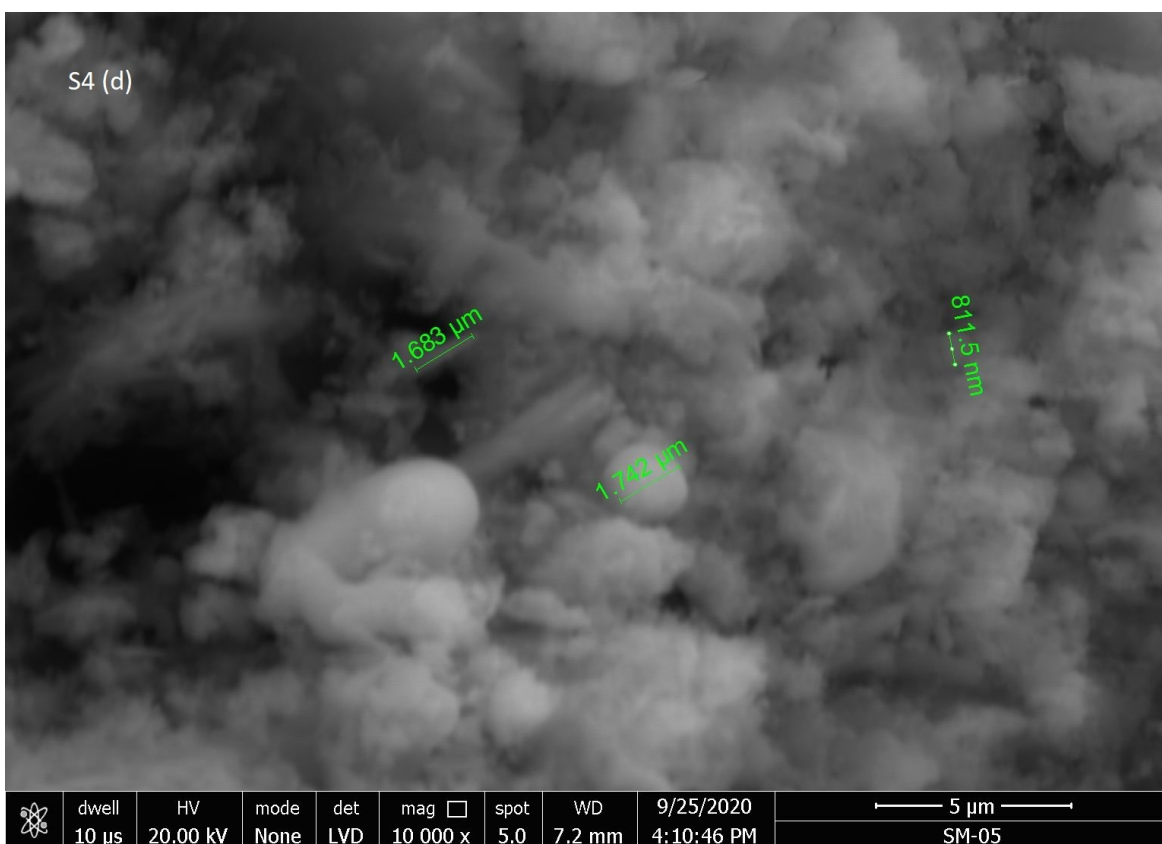

**Figure S5 (a): TEM image of the recovered OPA**

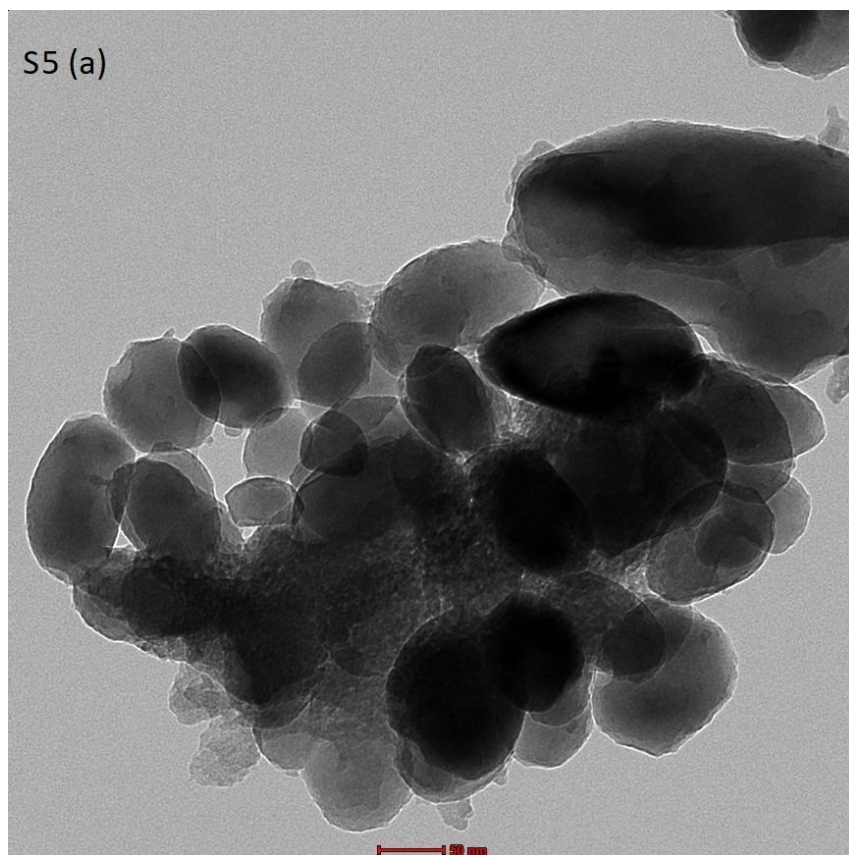

**Figure S5 (b): TEM image of the recovered OPA**

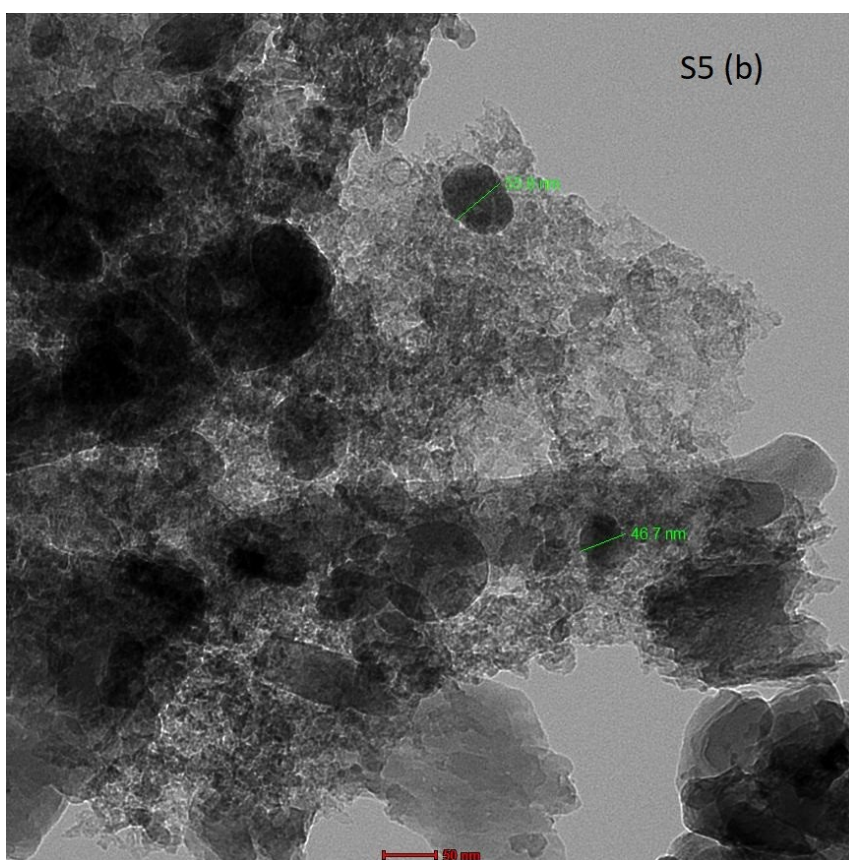

**Figure S5 (c): TEM image of the recovered OPA**

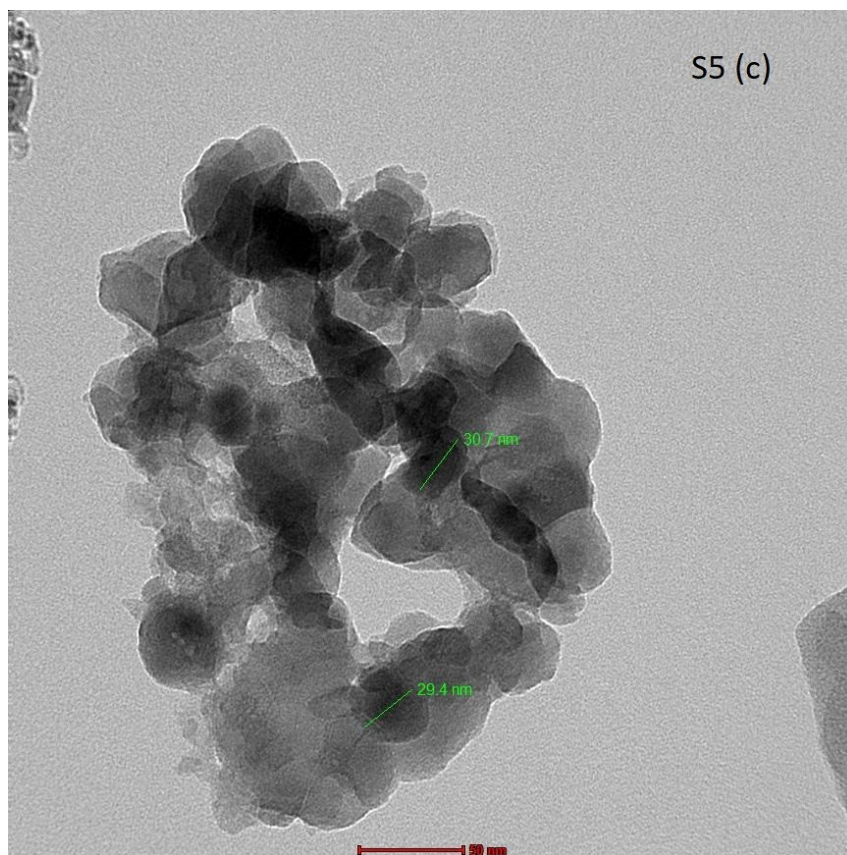

**Figure S5 (d): TEM image of the recovered OPA**

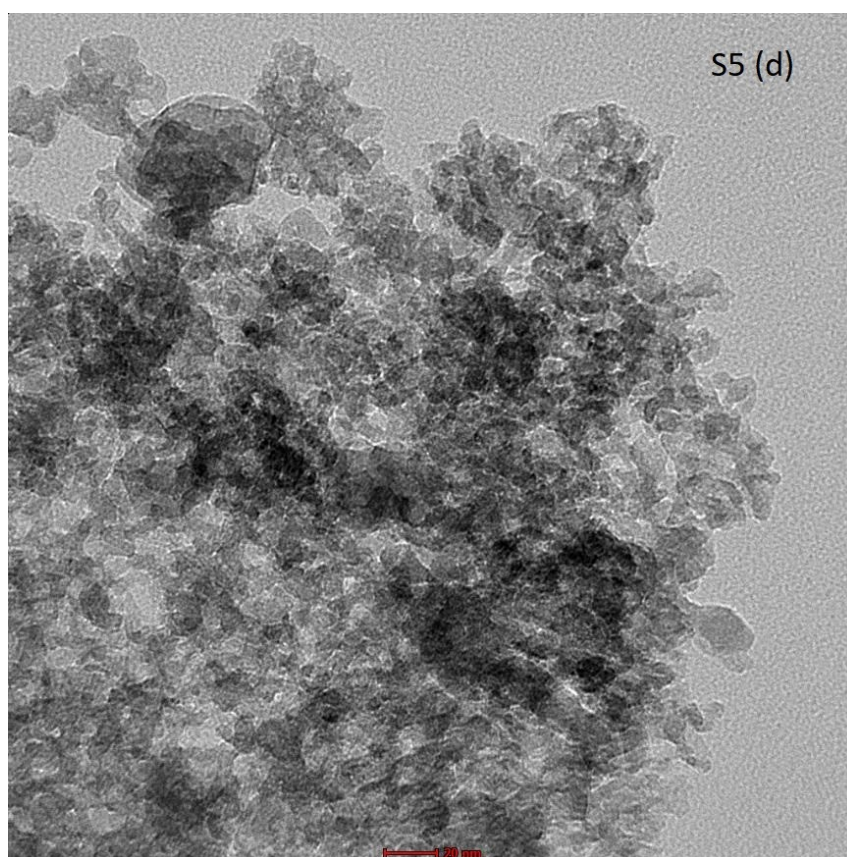

**Figure S6: HPLC data of the crude product**



### SAMPLE INFORMATION

|                            |                                         |
|----------------------------|-----------------------------------------|
| Sample Name: DMT Crude     | Acquired By: Breeze                     |
| Sample Type: Unknown       | Date Acquired: 11-05-2020 13:05:48 IST  |
| Vial: 1                    | Acq. Method: DMT                        |
| Injection #: 4             | Date Processed: 13-05-2021 10:00:32 IST |
| Injection Volume: 20.00 ul | Channel Name: W2489 ChA                 |
| Run Time: 30.00 Minutes    | Sample Set Name:                        |

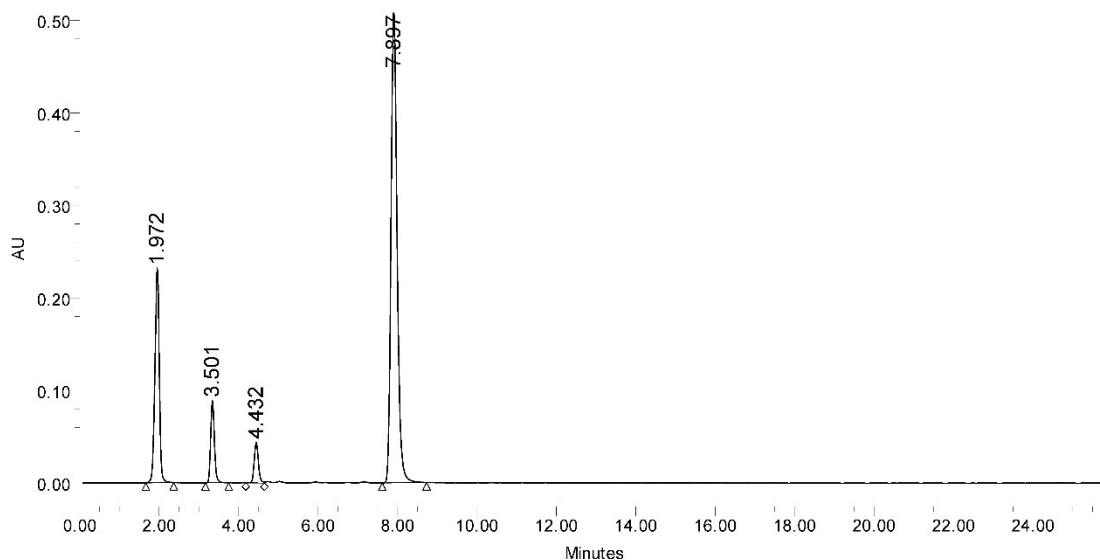

|   | RT (min) | Area (μV*sec) | % Area | Height (μV) | % Height |
|---|----------|---------------|--------|-------------|----------|
| 1 | 1.972    | 1673874       | 22.54  | 242345      | 26.56    |
| 2 | 3.501    | 578765        | 6.67   | 88975       | 9.87     |
| 3 | 4.432    | 215797        | 4.38   | 44325       | 3.64     |
| 4 | 7.897    | 5653864       | 63.29  | 521321      | 58.12    |

**Figure S7: HPLC data of the recrystallized DMT**

SAMPLE INFORMATION

|                   |                    |                  |                         |
|-------------------|--------------------|------------------|-------------------------|
| Sample Name:      | DMT Pure (1.00 mg) | Acquired By:     | Breeze                  |
| Sample Type:      | Unknown            | Date Acquired:   | 11-05-2020 12:09:32 IST |
| Vial:             | 1                  | Acq. Method:     | DMT                     |
| Injection #:      | 2                  | Date Processed:  | 29-06-2021 10:32:18 IST |
| Injection Volume: | 20.00 ul           | Channel Name:    | W2489 ChA               |
| Run Time:         | 30.00 Minutes      | Sample Set Name: |                         |

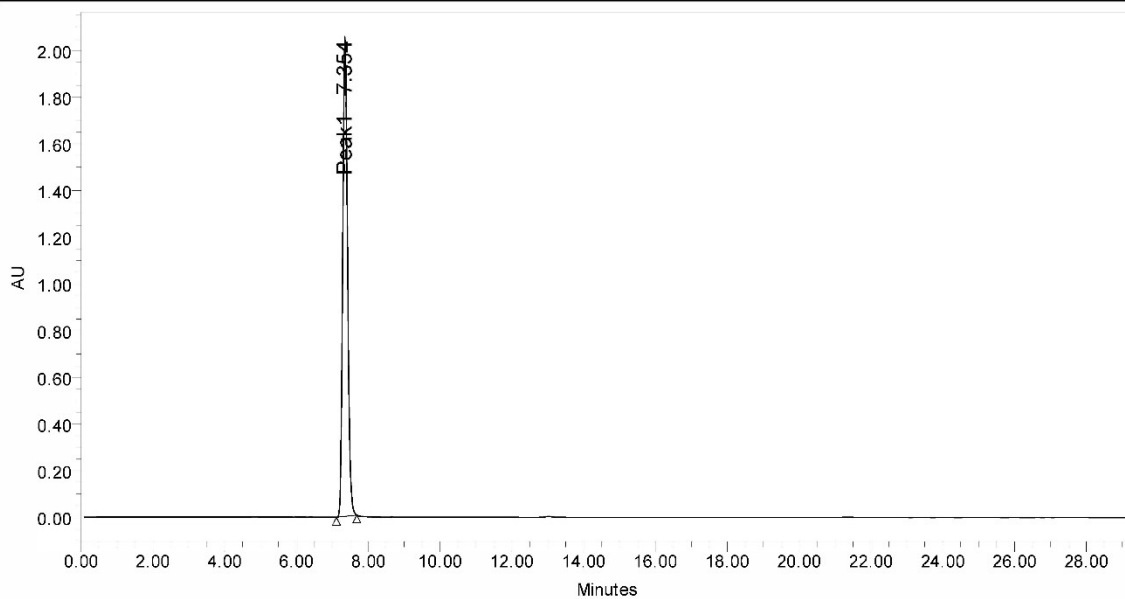

| Peak Name | RT (min) | Area (μV*sec) | % Area | Height (μV) | % Height |
|-----------|----------|---------------|--------|-------------|----------|
| 1 Peak1   | 7.354    | 19348572      | 100.00 | 2057226     | 100.00   |

Figure S8: HPLC data of commercial ethylene glycol

### SAMPLE INFORMATION

|                                    |                                         |
|------------------------------------|-----------------------------------------|
| Sample Name: ethylene glycol crude | Acquired By: Breeze                     |
| Sample Type: Unknow n              | Date Acquired: 28-04-2020 12:31:11 IST  |
| Vial: 1                            | Acq. Method: bhet                       |
| Injection #: 1                     | Date Processed: 14-08-2020 17:37:10 IST |
| Injection Volume: 20.00 ul         | Channel Name: W2489 ChA                 |
| Run Time: 30.00 Minutes            | Sample Set Name:                        |

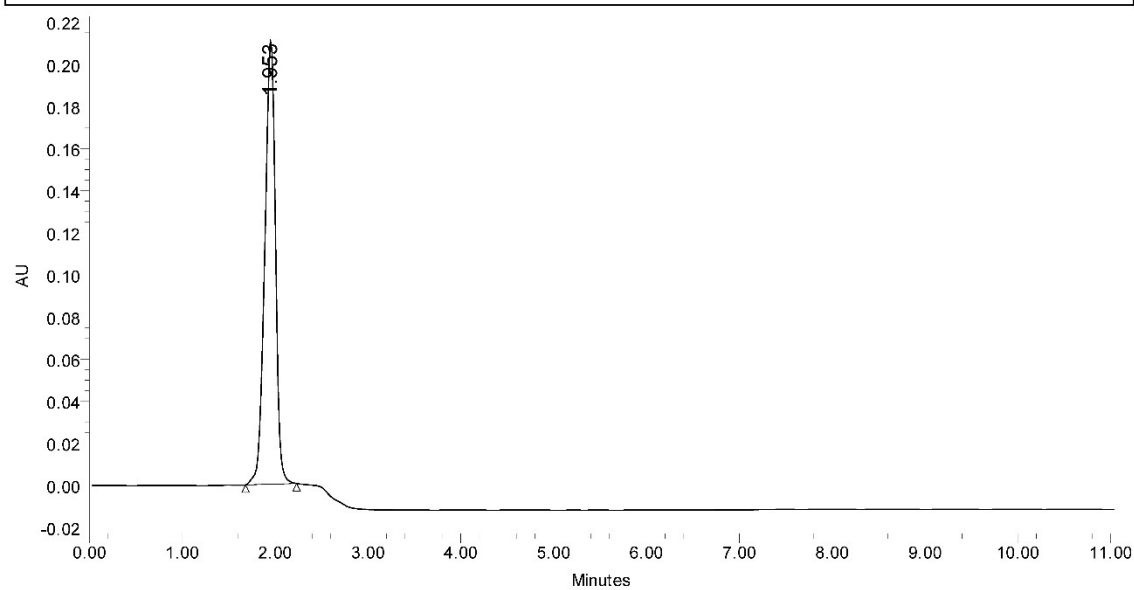

|   | RT<br>(min) | Area<br>( $\mu\text{V}\cdot\text{sec}$ ) | % Area | Height<br>( $\mu\text{V}$ ) | %<br>Height |
|---|-------------|------------------------------------------|--------|-----------------------------|-------------|
| 1 | 1.953       | 1680058                                  | 100.00 | 210724                      | 100.00      |

**Figure S9: HPLC data of HEMT**

| SAMPLE INFORMATION |               |                  |                         |
|--------------------|---------------|------------------|-------------------------|
| Sample Name:       | HEMT          | Acquired By:     | Breeze                  |
| Sample Type:       | Unknown       | Date Acquired:   | 20-11-2020 17:08:03 IST |
| Vial:              | 1             | Acq. Method:     | BHET 2                  |
| Injection #:       | 1             | Date Processed:  | 29-04-2021 14:15:46 IST |
| Injection Volume:  | 20.00 ul      | Channel Name:    | W2489 ChA               |
| Run Time:          | 20.00 Minutes | Sample Set Name: |                         |

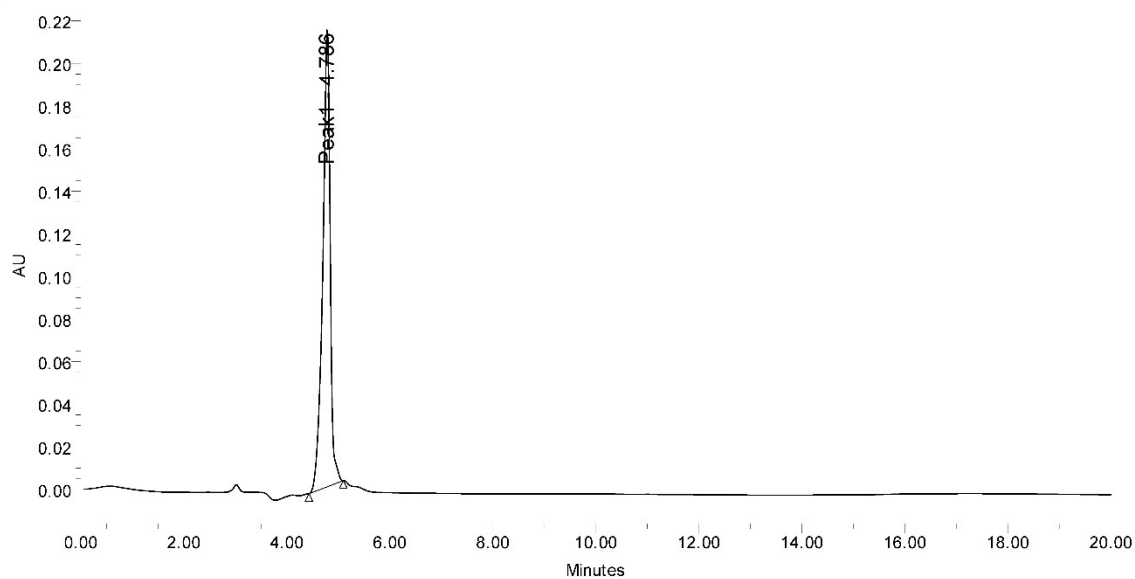

| Peak Name | RT (min) | Area (μV*sec) | % Area | Height (μV) | % Height |
|-----------|----------|---------------|--------|-------------|----------|
| 1 Peak1   | 4.786    | 2155448       | 100.00 | 214317      | 100.00   |

**Figure S10: HPLC data of BHET**

### SAMPLE INFORMATION

|                                  |                                         |
|----------------------------------|-----------------------------------------|
| Sample Name: bhet recrystallize1 | Acquired By: Breeze                     |
| Sample Type: Unknown             | Date Acquired: 06-02-2020 14:18:55 IST  |
| Vial: 1                          | Acq. Method: bhet                       |
| Injection #: 1                   | Date Processed: 27-10-2020 16:47:28 IST |
| Injection Volume: 20.00 ul       | Channel Name: W2489 ChA                 |
| Run Time: 10.00 Minutes          | Sample Set Name:                        |

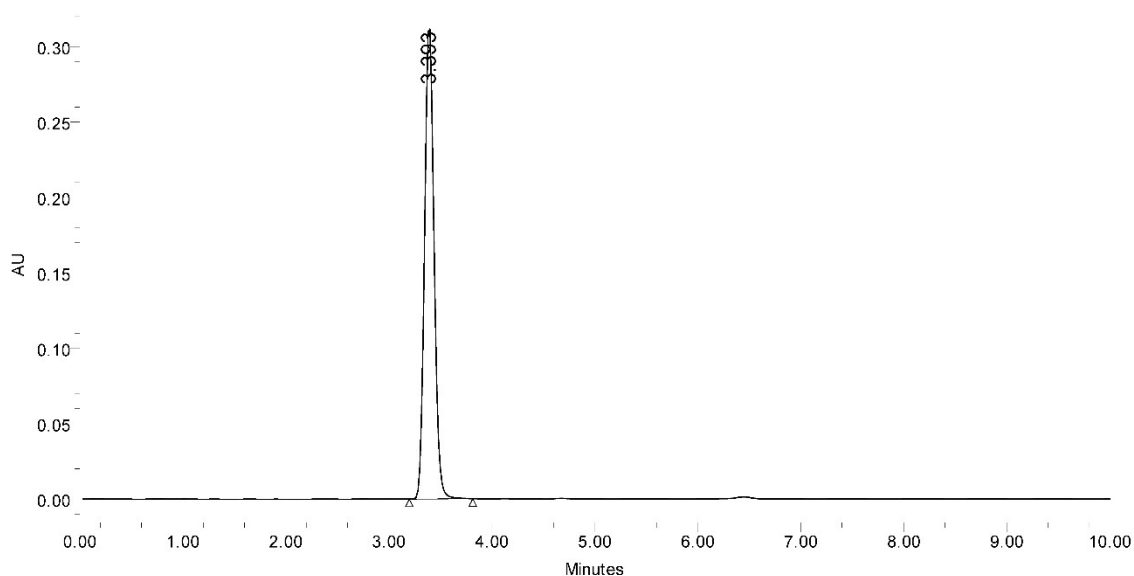

|   | RT<br>(min) | Area<br>( $\mu\text{V}\cdot\text{sec}$ ) | % Area | Height<br>( $\mu\text{V}$ ) | % Height |
|---|-------------|------------------------------------------|--------|-----------------------------|----------|
| 1 | 3.393       | 2015945                                  | 100.00 | 313590                      | 100.00   |

**Figure S11:  $^1\text{H}$  NMR data of recrystallized DMT**

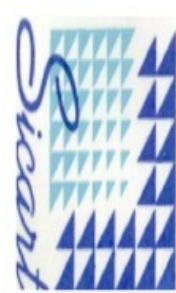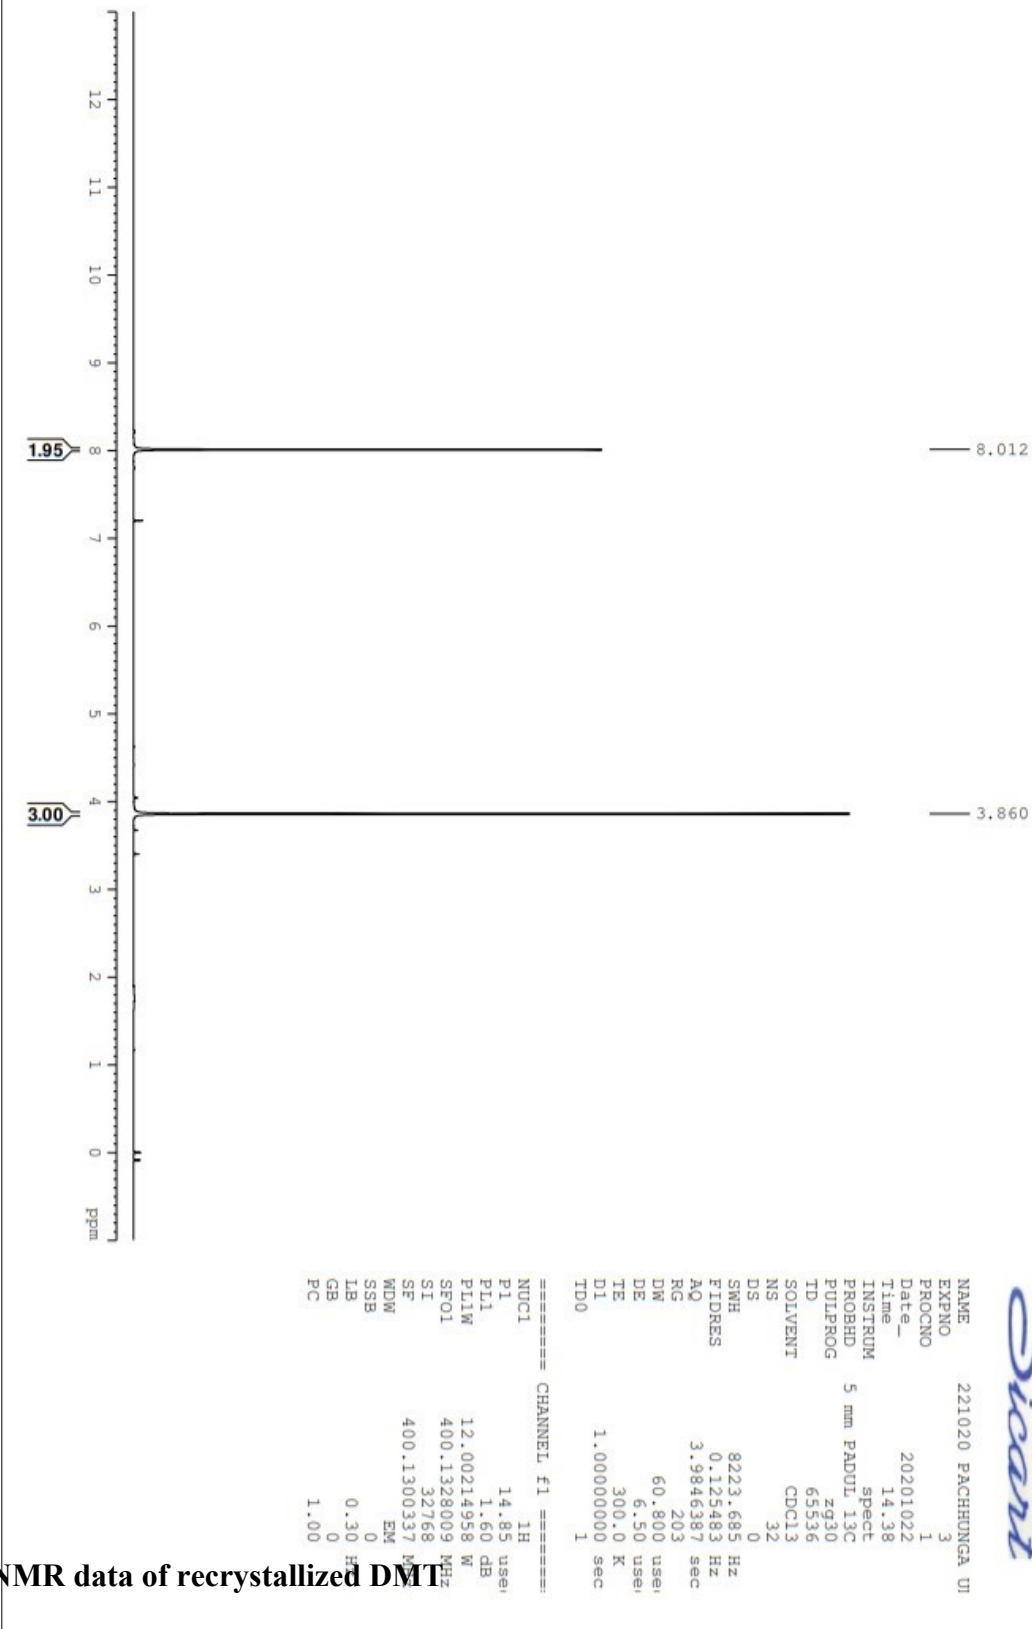

Figure S12: <sup>13</sup>C NMR data of recrystallized DMT

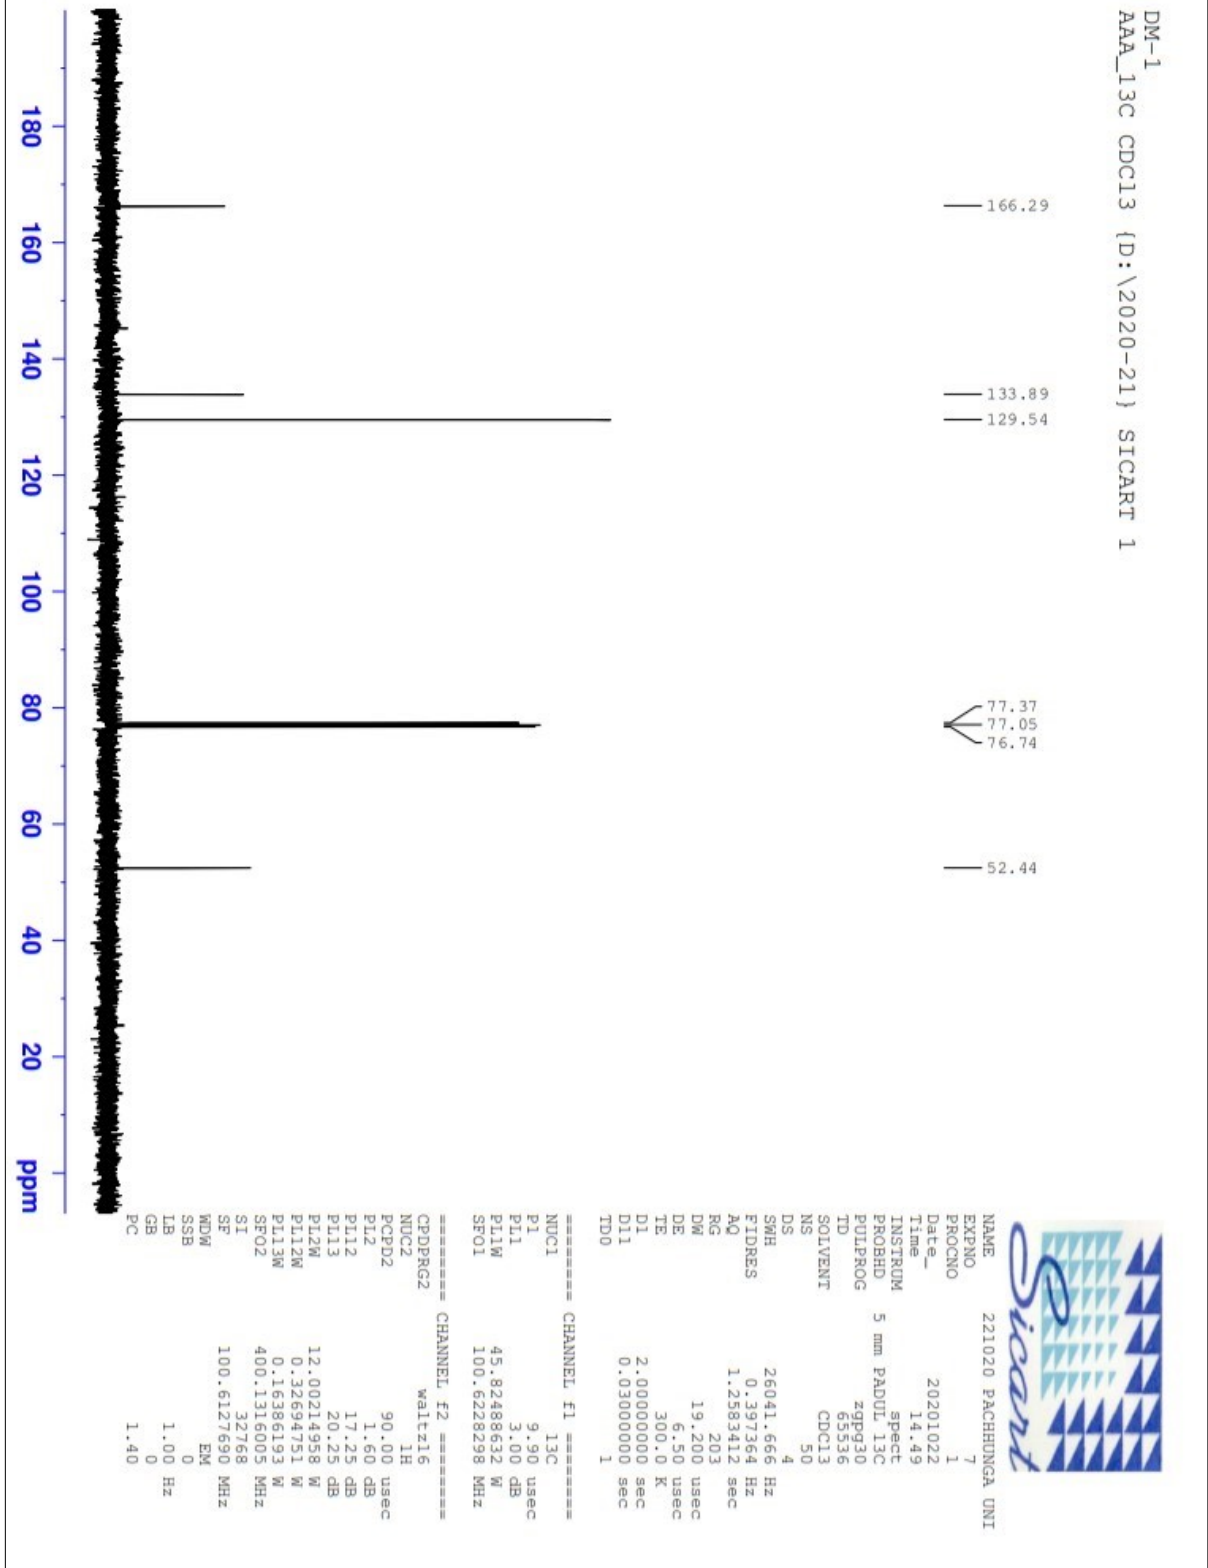

Figure S13: IR data of recrystallized DMT

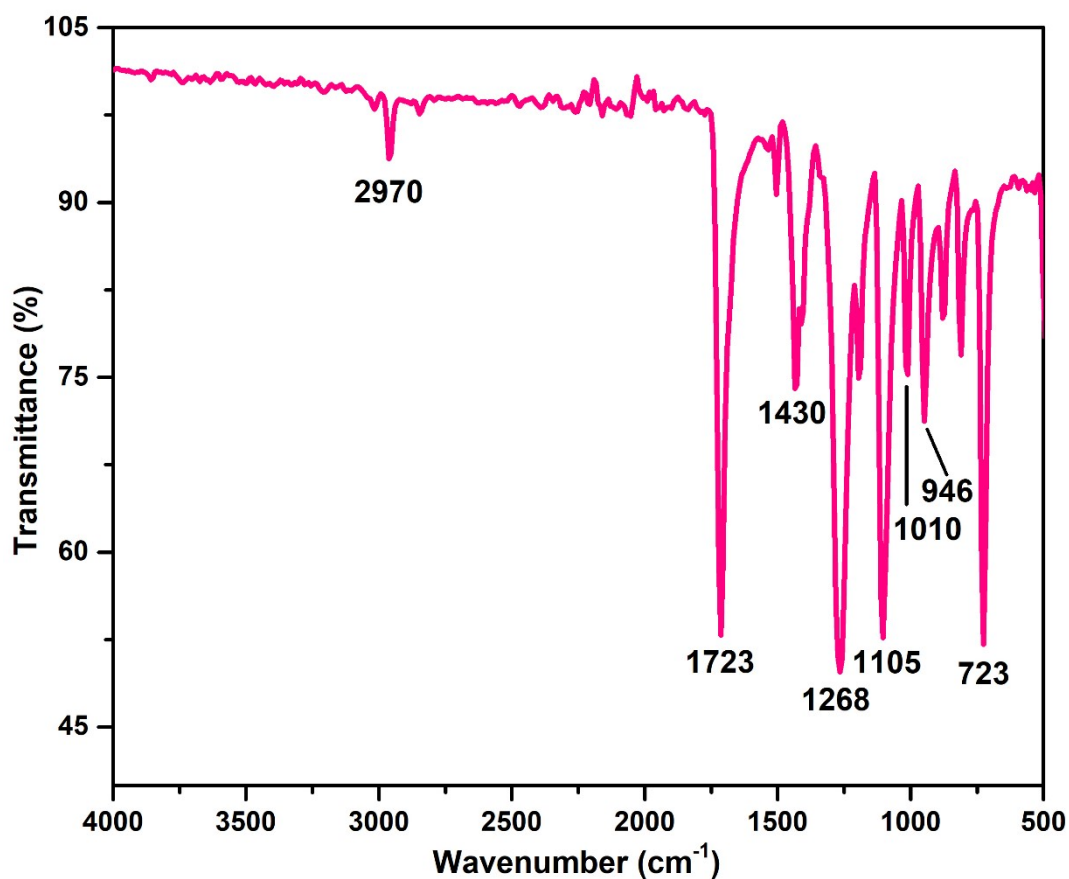

**Scheme S1: Proposed reaction mechanism of aldol reaction with OPA catalyst**

**Step 1: Generation of Carbanion and formation of enolate**

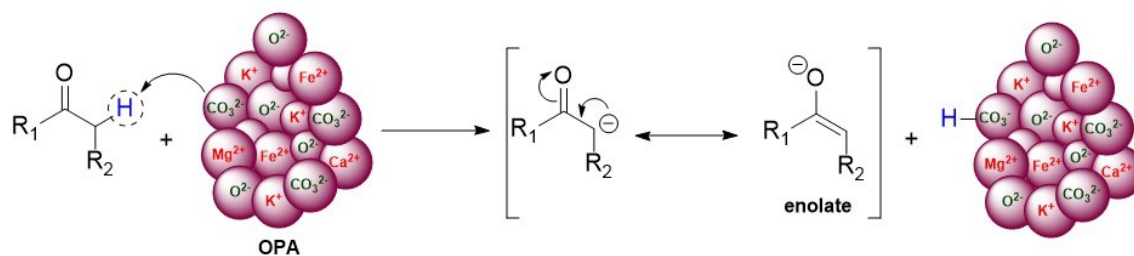

**Step 2: C-C Bond Formation**

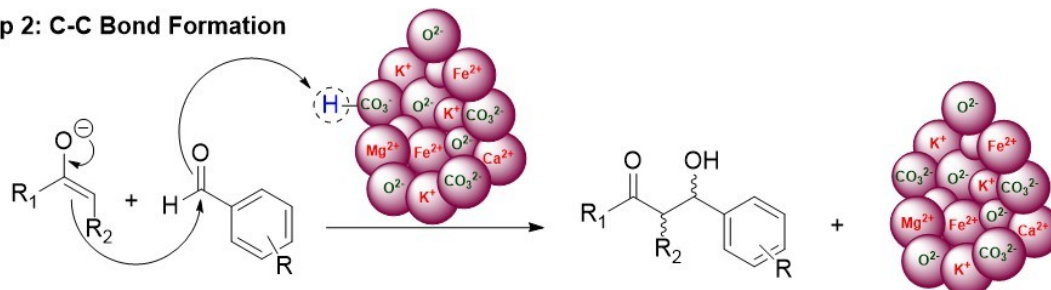

**Figure S14: HPLC data of the crude product using a reduced methanol loading**



### SAMPLE INFORMATION

|                   |               |                  |                         |
|-------------------|---------------|------------------|-------------------------|
| Sample Name:      | DMT Crude     | Acquired By:     | Breeze                  |
| Sample Type:      | Unknown n     | Date Acquired:   | 11-05-2020 13:05:48 IST |
| Vial:             | 1             | Acq. Method:     | DMT                     |
| Injection #:      | 4             | Date Processed:  | 13-05-2021 11:50:38 IST |
| Injection Volume: | 20.00 ul      | Channel Name:    | W2489 ChA               |
| Run Time:         | 30.00 Minutes | Sample Set Name: |                         |

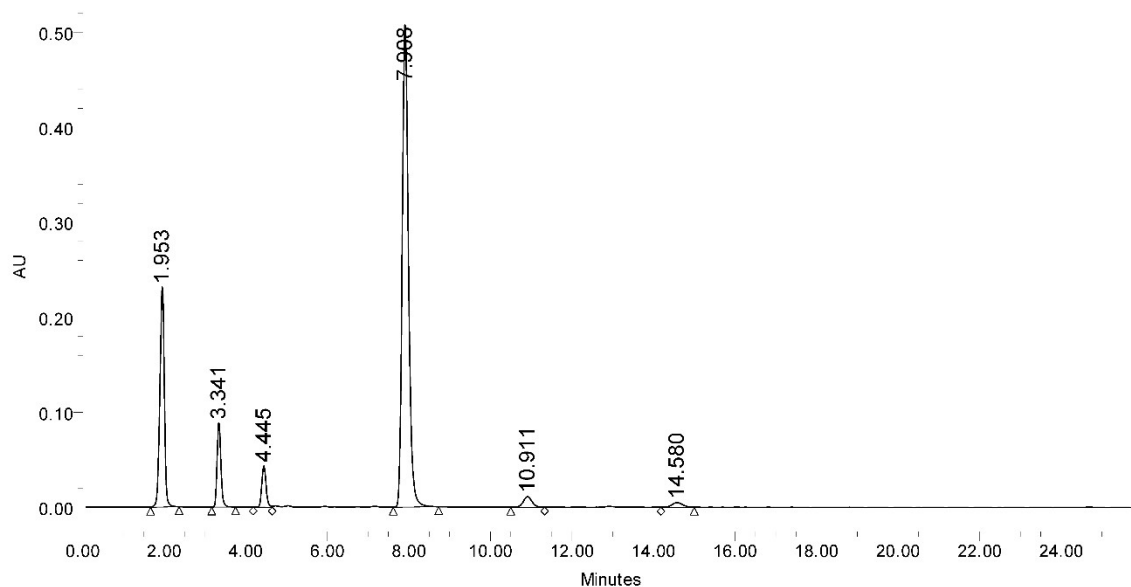

|   | RT (min) | Area (μV*sec) | % Area | Height (μV) | % Height |
|---|----------|---------------|--------|-------------|----------|
| 1 | 1.953    | 1786095       | 21.30  | 232044      | 26.01    |
| 2 | 3.341    | 585112        | 6.98   | 89348       | 10.02    |
| 3 | 4.445    | 321168        | 3.83   | 43772       | 4.91     |
| 4 | 7.908    | 5429925       | 64.77  | 510719      | 57.25    |
| 5 | 10.911   | 169048        | 2.02   | 11217       | 1.26     |
| 6 | 14.580   | 92362         | 1.10   | 4970        | 0.56     |

**Figure S15: HPLC data of the crude product after 2 hrs reaction time**

**SAMPLE INFORMATION**

|                            |                                         |
|----------------------------|-----------------------------------------|
| Sample Name: DMT Crude     | Acquired By: Breeze                     |
| Sample Type: Unknown       | Date Acquired: 21-12-2020 17:53:31 IST  |
| Vial: 1                    | Acq. Method: BHET 2                     |
| Injection #: 1             | Date Processed: 29-06-2021 10:27:54 IST |
| Injection Volume: 20.00 ul | Channel Name: W2489 ChA                 |
| Run Time: 20.00 Minutes    | Sample Set Name:                        |

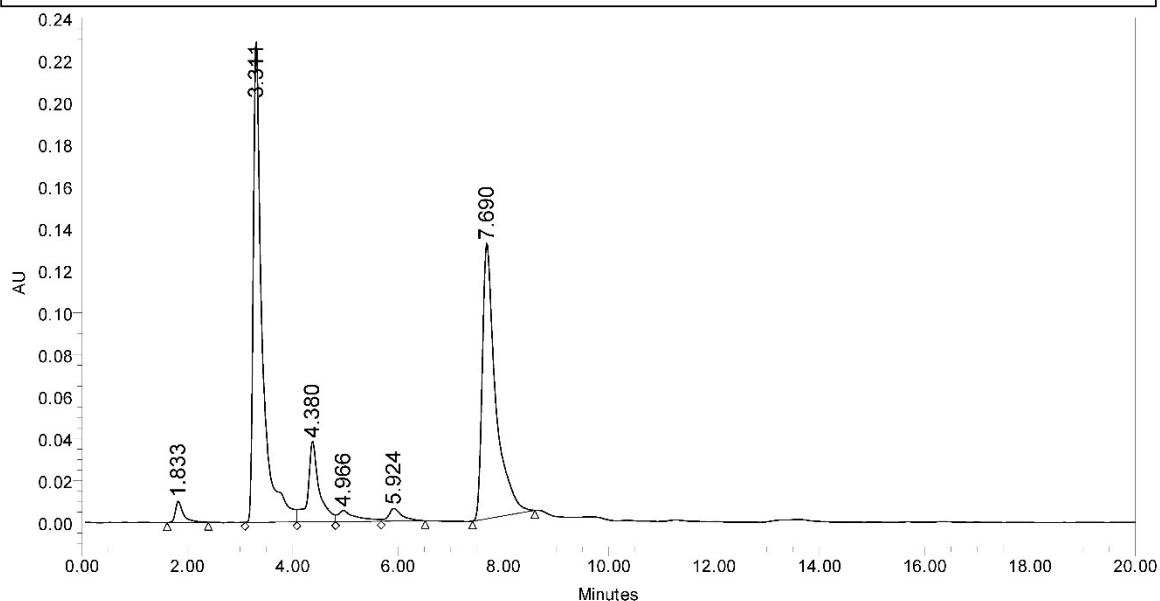

|   | RT (min) | Area (μV*sec) | % Area | Height (μV) | % Height |
|---|----------|---------------|--------|-------------|----------|
| 1 | 1.833    | 105535        | 1.78   | 10065       | 2.39     |
| 2 | 3.311    | 2717211       | 45.74  | 229329      | 54.56    |
| 3 | 4.380    | 569432        | 9.59   | 38319       | 9.12     |
| 4 | 4.966    | 125246        | 2.11   | 5272        | 1.25     |
| 5 | 5.924    | 103212        | 1.74   | 6041        | 1.44     |
| 6 | 7.690    | 2320139       | 39.05  | 131330      | 31.24    |

**Table S2: Methanalysis of Colored PET Bottles using OPA**

| Sl. No. | PET Color    | Catalyst Loading | MeOH (mL) | Time (h) | Temp. (°C) | DMT Yield % |
|---------|--------------|------------------|-----------|----------|------------|-------------|
| 1.      | Clear        | 30               | 5         | 1        | 200        | 78          |
| 2.      | Red          | 30               | 5         | 1        | 200        | 69          |
| 3.      | Light-Yellow | 30               | 5         | 1        | 200        | 61          |
| 4.      | Green        | 30               | 5         | 1        | 200        | 74          |

**Figure S16: UV-Vis Spectra of DMT monomer obtained from clear, red, light-yellow and green PET bottles. The samples were dissolved in chloroform (5 mg/ml).**

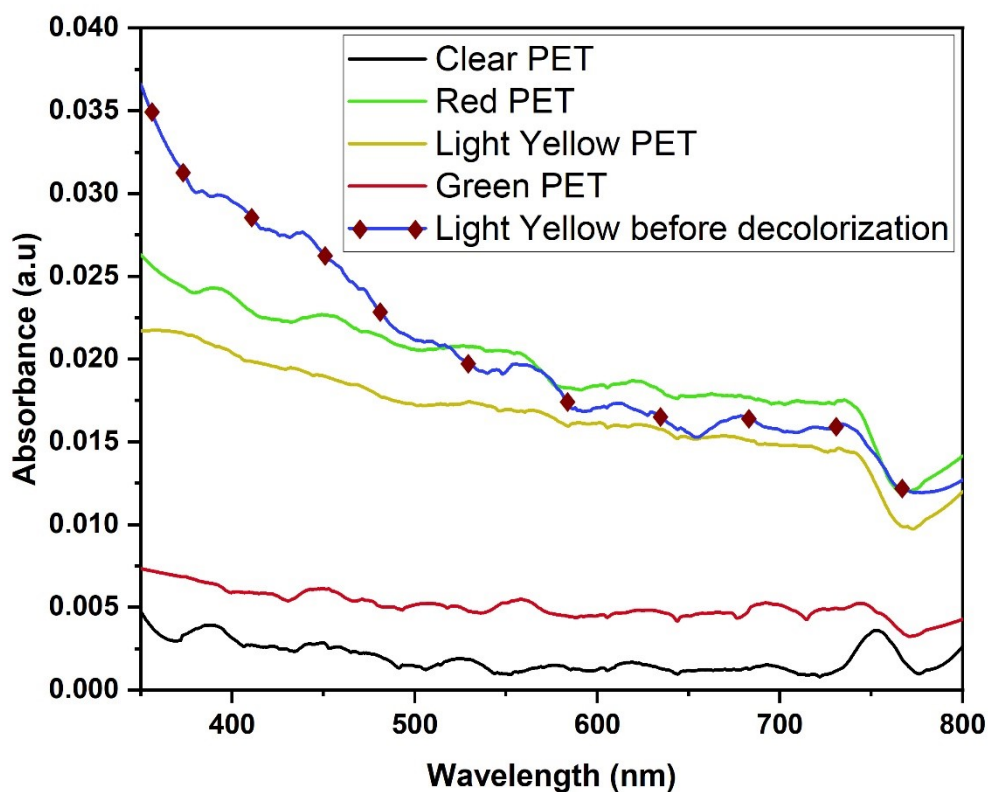

**Table S3: Reusability of the Catalyst**

| Sl. No. | No. of Catalyst Cycle | Catalyst Loading | MeOH | Time (h) | Temp. (°C) | DMT Yield % |
|---------|-----------------------|------------------|------|----------|------------|-------------|
| 1       | First                 | 30               | 5    | 1        | 200        | 78          |
| 2       | Second                | 30               | 5    | 1.5      | 200        | 73          |
| 3       | Third                 | 30               | 5    | 2.5      | 200        | 71          |
| 4       | Fourth                | 30               | 5    | 3.5      | 200        | 68          |

## NMR SPECTRAL DATA OF THE ALDOL PRODUCT:

**2-(hydroxy(4-nitrophenyl)methyl)cyclohexan-1-one (7a, white solid):**

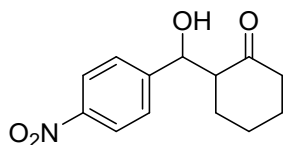

$^1\text{H NMR}$  (400 MHz,  $\text{CDCl}_3$ ):  $\delta$  8.22 - 7.47 (m, 4H), 5.48 (d,  $J = 2.4$  Hz, 1H for *syn*), 4.90 (d,  $J = 8.4$  Hz, 1H for *anti*), 2.48 - 1.54 (m, 9H);  $^{13}\text{CNMR}$  (100 MHz,  $\text{CDCl}_3$ ):  $\delta$  214.95, 214.26, 149.30, 148.58, 128.11, 126.85, 123.81, 123.70, 74.28, 70.38, 57.43, 57.04, 42.91, 42.85, 31.00, 28.08, 27.87, 26.16, 25.02, 24.94.

**2-(hydroxy(3-nitrophenyl)methyl)cyclohexan-1-one (7b, oily liquid):**

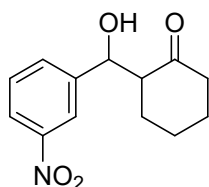

$^1\text{H NMR}$  (400 MHz,  $\text{CDCl}_3$ ):  $\delta$  8.21 - 7.51 (m, 4H), 5.48 (d,  $J = 2.0$  Hz, 1H for *syn*), 4.89 (d,  $J = 8.4$  Hz, 1H for *anti*), 2.62 - 1.55 (m, 9H);  $^{13}\text{CNMR}$  (100 MHz,  $\text{CDCl}_3$ ):  $\delta$  215.06, 214.33, 148.55, 144.06, 143.51, 133.42, 132.18, 129.53, 129.38, 123.10, 122.32, 122.26, 121.11, 74.28, 70.15, 57.37, 57.00, 42.89, 42.84, 30.98, 28.09, 27.86, 26.15, 24.99, 24.90.

**2-(hydroxy(2-nitrophenyl)methyl)cyclohexan-1-one (7c, oily liquid):**

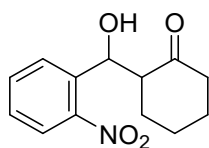

$^1\text{H NMR}$  (400 MHz,  $\text{CDCl}_3$ ):  $\delta$  8.11 - 7.42 (m, 4H), 5.96 (d,  $J = 2.0$  Hz, 1H for *syn*), 5.47 (d,  $J = 8.4$  Hz, 1H for *anti*), 2.46 - 1.55 (m, 9H);  $^{13}\text{CNMR}$  (100 MHz,  $\text{CDCl}_3$ ):  $\delta$  214.28, 188.34, 137.22, 134.28, 133.92, 133.37, 129.88, 129.86, 128.17, 124.89, 124.74, 66.93, 55.08, 42.80, 28.23, 26.76, 25.10.

**2-((4-chlorophenyl)(hydroxy)methyl)cyclohexan-1-one (7d, white solid):**

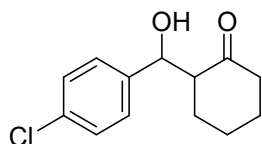

$^1\text{H}$  NMR (400 MHz,  $\text{CDCl}_3$ ):  $\delta$  7.41 - 7.10 (m, 4H), 5.27 (s, 1H for *syn*), 4.69-4.66 (dd,  $J_1 = 2.8$  Hz,  $J_2 = 2.4$  Hz, 1H for *anti*), 3.91 (d,  $J = 2.8$  Hz, 1H for OH), 2.50-1.03 (m, 9H);  $^{13}\text{C}$  NMR (100 MHz,  $\text{CDCl}_3$ ):  $\delta$  213.96, 213.32, 142.97, 141.25, 131.43, 131.36, 127.98, 127.54, 121.72, 121.12, 74.13, 70.32, 57.43, 57.12, 42.67, 30.85, 28.12, 27.86, 26.14, 25.24, 24.97.

**2-((3-chlorophenyl)(hydroxy)methyl)cyclohexan-1-one (7e, white solid):**

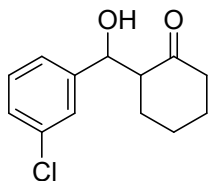

$^1\text{H}$  NMR (400 MHz,  $\text{CDCl}_3$ ):  $\delta$  7.25 - 7.08 (m, 4H), 5.28 (s, 1H for *syn*), 4.68 - 4.66 (d,  $J = 8.8$  Hz, 1H for *anti*), 3.96 (s, 1H for OH), 2.52 - 1.46 (m, 9H);  $^{13}\text{C}$  NMR (100 MHz,  $\text{CDCl}_3$ ):  $\delta$  215.41, 143.31, 134.58, 129.83, 129.67, 128.28, 127.38, 126.25, 125.53, 124.10, 74.50, 70.31, 57.50, 57.20, 42.89, 31.01, 28.13, 27.95, 26.16, 25.05, 24.93.

**2-((2-chlorophenyl)(hydroxy)methyl)cyclohexan-1-one (7f, white solid):**

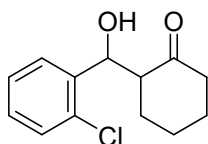

$^1\text{H}$  NMR (400 MHz,  $\text{CDCl}_3$ ):  $\delta$  7.55 - 7.18 (m, 4H), 5.71 (2, 1H for *syn*), 5.36 - 5.33 (dd,  $J_1 = 3.6$  Hz,  $J_2 = 4.0$  Hz, 1H for *anti*), 4.05 (d,  $J = 3.6$ , 1H for OH), 2.69 - 1.53 (m, 9H);  $^{13}\text{C}$  NMR (100 MHz,  $\text{CDCl}_3$ ):  $\delta$  215.27, 214.79, 139.10, 138.58, 132.97, 130.86, 129.22, 128.75, 128.54, 128.26, 128.20, 127.26, 126.61, 70.45, 67.72, 57.60, 53.57, 42.73, 42.67, 30.40, 27.95, 27.82, 25.97, 24.92, 24.86.

**2-((4-bromophenyl)(hydroxy)methyl)cyclohexan-1-one (7g, white solid):**

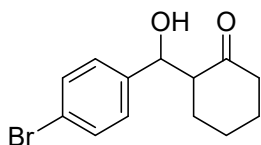

$^1\text{H}$  NMR (400 MHz,  $\text{CDCl}_3$ ):  $\delta$  7.48 - 7.17 (m, 4H), 5.33 (d,  $J = 2.4$  Hz, 1H for *syn*), 4.75 (d,  $J = 8.8$  Hz, 1H for *anti*), 2.55 - 1.52 (m, 9H);  $^{13}\text{C}$  NMR (100 MHz,  $\text{CDCl}_3$ ):  $\delta$  215.27, 214.57, 140.53, 140.02, 131.49, 131.26, 128.75, 127.55, 121.72, 120.77, 74.19, 70.15, 57.33, 56.99, 42.67, 30.76, 27.93, 27.73, 25.96, 24.85, 24.71.

**2-(hydroxy(phenyl)methyl)cyclohexan-1-one (7h, white solid):**

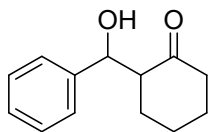

$^1\text{H NMR}$  (400 MHz,  $\text{CDCl}_3$ ):  $\delta$  7.34 - 7.26 (m, 5H), 5.39 (d,  $J = 2.4$  Hz, 1H for *syn*), 4.78 (d,  $J = 8.8$  Hz, 1H for *anti*), 2.47 - 1.52(m, 9H);  $^{13}\text{CNMR}$  (100 MHz,  $\text{CDCl}_3$ ):  $\delta$  215.78, 215.04, 141.72, 141.17, 128.63, 128.40, 128.15, 127.28, 127.23, 126.01, 75.38, 70.89, 57.67, 57.44, 42.93, 31.10, 28.19, 28.05, 26.26, 25.13, 24.98.

**2-(hydroxy(p-tolyl)methyl)cyclohexan-1-one (7i, white solid):**

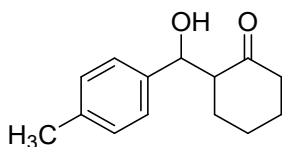

$^1\text{H NMR}$  (400 MHz,  $\text{CDCl}_3$ ):  $\delta$  7.25-7.13 (m, 4H), 5.34 (d,  $J = 1.6$  Hz, 1H for *syn*), 4.75 (d,  $J = 8.8$  Hz, 1H for *anti*), 2.60 - 1.52 (m, 12H);  $^{13}\text{CNMR}$  (100 MHz,  $\text{CDCl}_3$ ):  $\delta$  215.85, 215.07, 138.74, 138.22, 137.80, 136.79, 129.29, 129.08, 127.17, 125.94, 74.80, 70.82, 57.68, 57.49, 42.91, 31.12, 28.19, 28.06, 26.35, 25.13, 24.90, 21.38, 21.30.

**2-(hydroxy(4-methoxyphenyl)methyl)cyclohexan-1-one (7j, light yellow solid):**

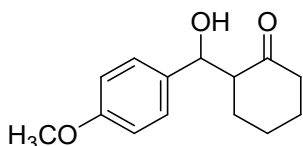

$^1\text{H NMR}$  (400 MHz,  $\text{CDCl}_3$ ):  $\delta$  7.86 - 7.82 (m, 4H), 5.32 (d,  $J = 2.4$  Hz, 1H for *syn*), 4.74 (d,  $J = 8.8$  Hz, 1H for *anti*), 3.89 (s, 3H, for *syn*-isomer), 3.80 (s, 3H, for *anti*-isomer), 2.59 - 1.25 (m, 9H);  $^{13}\text{CNMR}$  (100 MHz,  $\text{CDCl}_3$ ):  $\delta$  215.87, 215.11, 191.05, 159.52, 158.86, 133.86, 133.40, 132.23, 128.39, 127.16, 114.56, 114.03, 113.82, 74.51, 70.65, 57.74, 57.51, 55.50, 42.91, 42.89, 31.08, 28.20, 28.03, 26.43, 25.11, 24.96.

**4-hydroxy-4-(4-nitrophenyl)butan-2-one (7k, light yellow solid):**

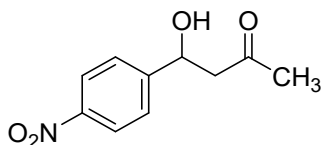

$^1\text{H}$  NMR (400 MHz,  $\text{CDCl}_3$ ):  $\delta$  8.27 - 7.09 (m, 4H), 5.17 - 5.07 (dd,  $J = 2.4, 2.4$  Hz, 1H), 3.02 - 1.73 (m, 6H);  $^{13}\text{C}$  NMR (100 MHz,  $\text{CDCl}_3$ ):  $\delta$  197.74, 148.88, 140.91, 140.31, 130.62, 129.04, 128.72, 124.45, 123.99, 50.80, 44.64, 28.27.

**4-hydroxy-4-(3-nitrophenyl)butan-2-one (7l, light pinkish white solid):**

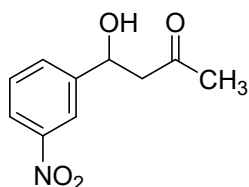

$^1\text{H}$  NMR (400 MHz,  $\text{CDCl}_3$ ):  $\delta$  8.41 - 7.53 (m, 4H), 5.19 - 5.07 (dd,  $J = 2.4, 2.4$  Hz, 1H), 3.00 - 1.69 (m, 6H);  $^{13}\text{C}$  NMR (100 MHz,  $\text{CDCl}_3$ ):  $\delta$  197.76, 151.23, 140.41, 136.54, 133.97, 130.28, 129.64, 124.94, 122.84, 51.98, 28.31.

**4-(4-chlorophenyl)-4-hydroxybutan-2-one (7m, white solid):**

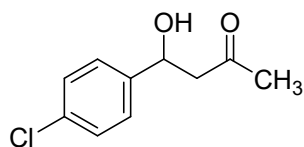

$^1\text{H}$  NMR (400 MHz,  $\text{CDCl}_3$ ):  $\delta$  7.32 - 7.23 (m, 4H), 5.14 - 5.10 (dd,  $J = 3.6, 3.6$  Hz, 1H), 2.98 - 2.14 (m, 6H);  $^{13}\text{C}$  NMR (100 MHz,  $\text{CDCl}_3$ ):  $\delta$  198.08, 141.88, 136.47, 132.96, 129.40, 129.28, 127.50, 51.28, 27.67.

**4-hydroxy-4-phenylbutan-2-one (7n, colourless liquid):**

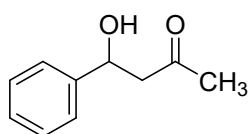

$^1\text{H}$  NMR (400 MHz,  $\text{CDCl}_3$ ):  $\delta$  7.33 - 7.23 (m, 5H), 5.13 - 5.10 (dd,  $J = 3.6, 3.6$  Hz, 1H), 2.99 - 2.15 (m, 6H);  $^{13}\text{C}$  NMR (100 MHz,  $\text{CDCl}_3$ ):  $\delta$  209.17, 143.03, 128.66, 127.79, 125.78, 69.99, 52.16, 30.88.

**4-hydroxy-4-(p-tolyl)butan-2-one (7o, light yellow liquid):**

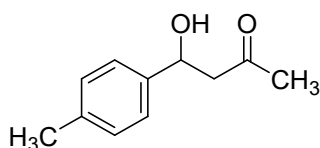

$^1\text{H}$  NMR (400 MHz,  $\text{CDCl}_3$ ):  $\delta$  7.62 - 7.18 (m, 4H), 5.51 - 5.48 (dd,  $J = 2.4, 2.4$  Hz, 1H), 3.00 - 2.64 (m, 6H), 2.20 (s, 3H);  $^{13}\text{C}$  NMR (100 MHz,  $\text{CDCl}_3$ ):  $\delta$  209.38, 140.35, 131.34, 129.54, 128.79, 127.45, 127.29, 50.23.

**4-hydroxy-4-(4-methoxyphenyl)butan-2-one (7p, white solid):**

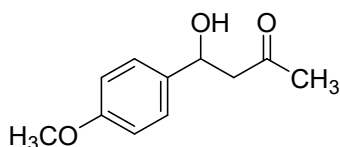

$^1\text{H}$  NMR (400 MHz,  $\text{CDCl}_3$ ):  $\delta$  7.51 - 7.6.91 (m, 4H), 5.53 - 5.46 (dd,  $J = 2.4, 2.4$  Hz, 1H), 3.84 (s, 3H), 3.01 - 2.35 (m, 6H);  $^{13}\text{C}$  NMR (100 MHz,  $\text{CDCl}_3$ ):  $\delta$  198.63, 161.87, 143.49, 130.19, 127.33, 125.28, 114.69, 55.63, 27.61.

**3-hydroxy-3-(4-nitrophenyl)-1-phenylpropan-1-one (7q, white solid):**

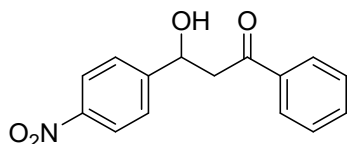

$^1\text{H}$  NMR (400 MHz,  $\text{CDCl}_3$ ):  $\delta$  8.24 - 7.26 (m, 9H), 5.47 - 5.44 (dd,  $J = 3.7, 3.2$  Hz, 1H), 3.44 - 3.31 (m, 3H);  $^{13}\text{C}$  NMR (100 MHz,  $\text{CDCl}_3$ ):  $\delta$  199.73, 150.45, 147.62, 136.43, 134.25, 129.07, 128.39, 126.80, 124.04, 69.47, 47.20.

**3-hydroxy-3-(3-nitrophenyl)-1-phenylpropan-1-one (7r, light yellow solid):**

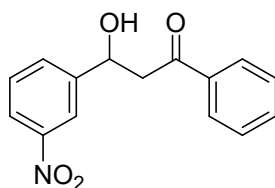

$^1\text{H}$  NMR (400 MHz,  $\text{CDCl}_3$ ):  $\delta$  8.32 - 7.46 (m, 9H), 5.46 - 5.44 (dd,  $J = 3.2, 3.6$  Hz, 1H), 3.46 - 3.33 (m, 3H);  $^{13}\text{C}$  NMR (100 MHz,  $\text{CDCl}_3$ ):  $\delta$  199.80, 148.68, 145.34, 136.45, 134.20, 132.17, 129.74, 129.04, 128.39, 122.81, 121.11.



**Figure S17: <sup>1</sup>H NMR data of 2-(hydroxy(4-nitrophenyl)methyl)cyclohexan-1-one (7a)**

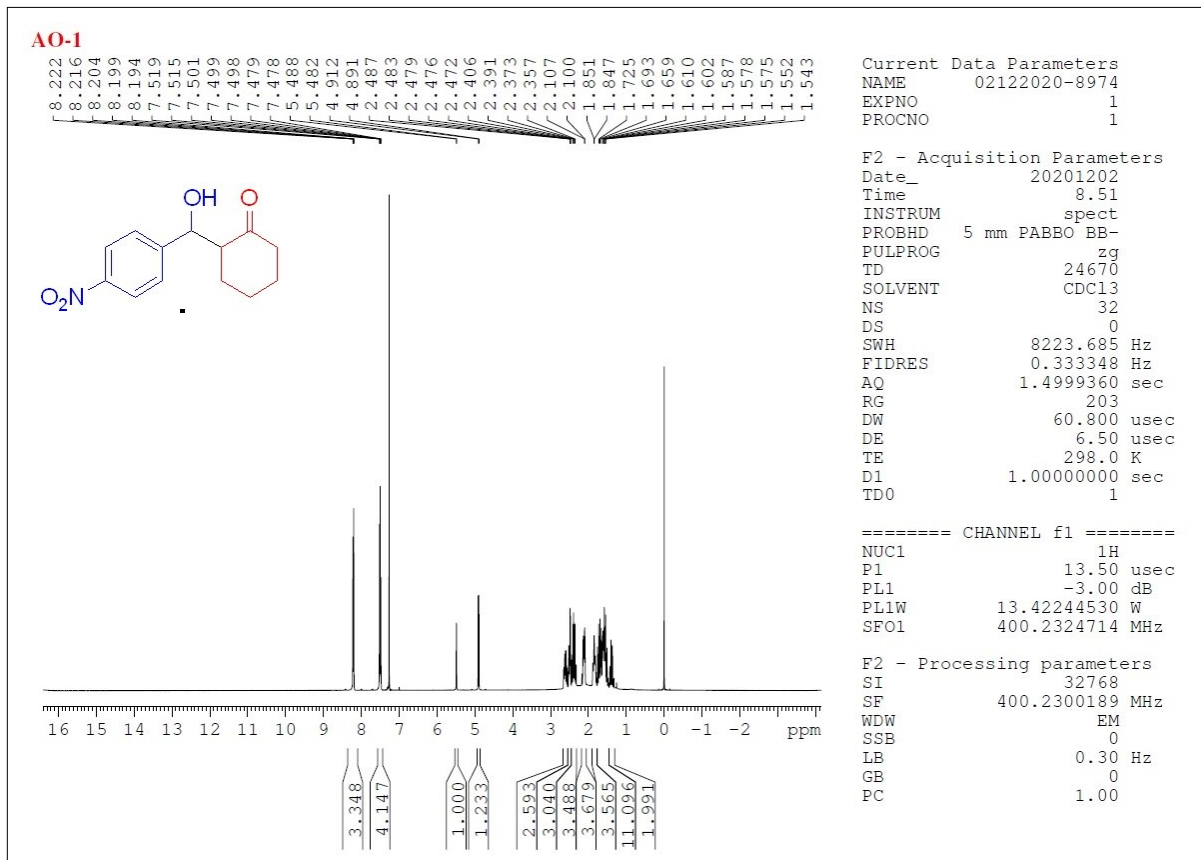

**Figure S18: <sup>13</sup>C NMR data of 2-(hydroxy(4-nitrophenyl)methyl)cyclohexan-1-one (7a)**

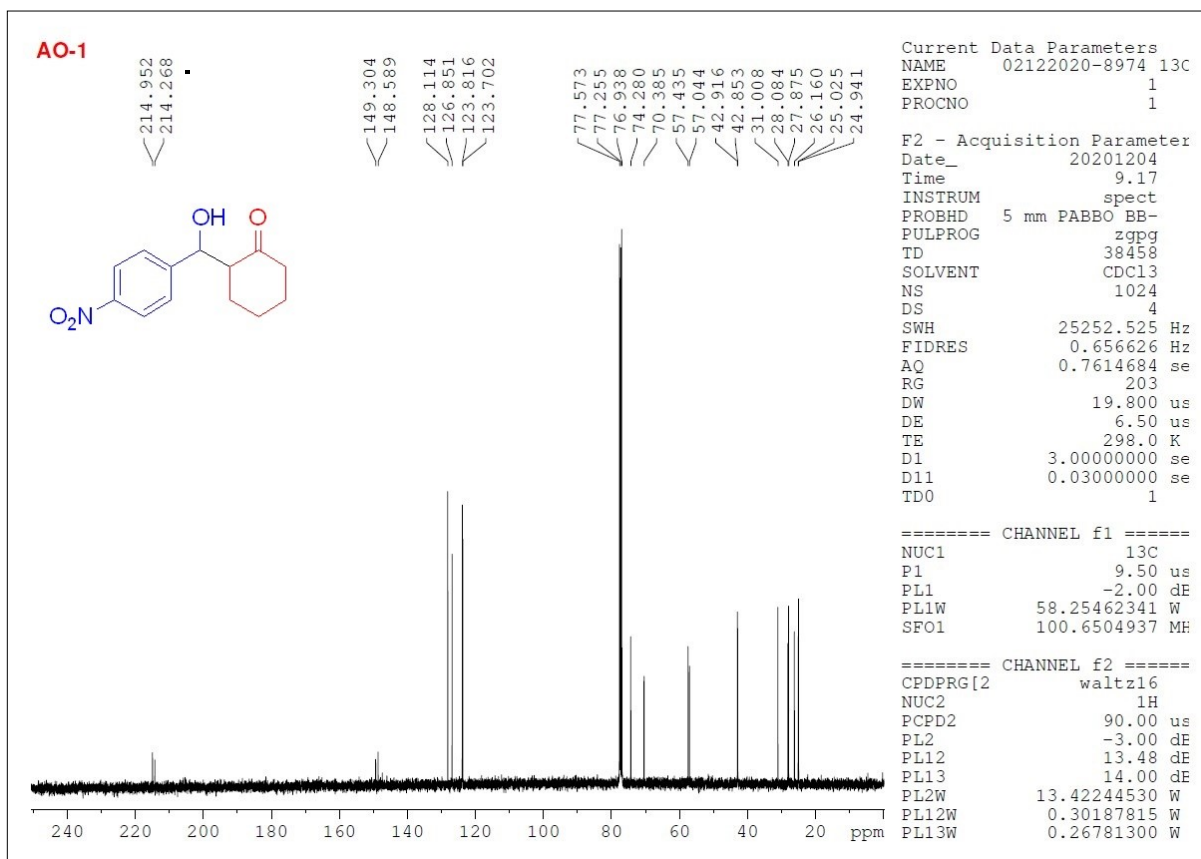

Figure S19: <sup>1</sup>H NMR data of 2-(hydroxy(3-nitrophenyl)methyl)cyclohexan-1-one (7b)

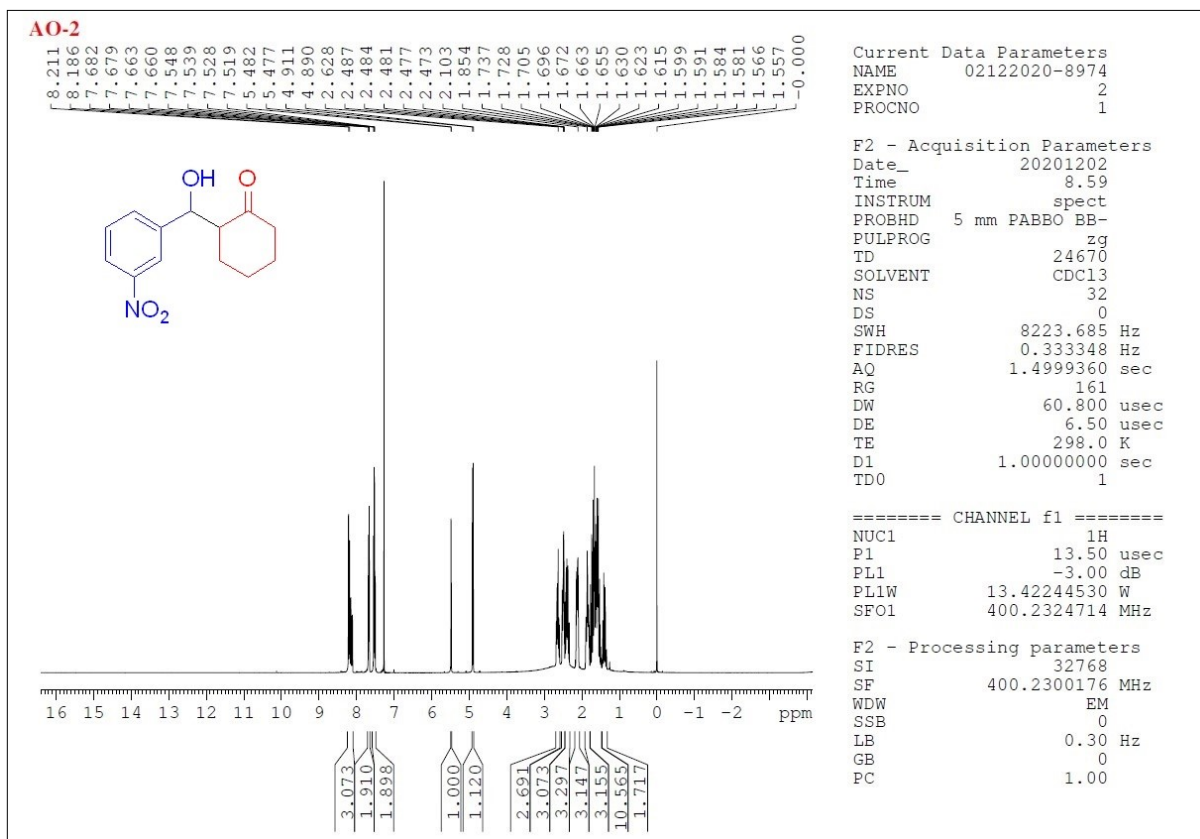

Figure S20: <sup>13</sup>C NMR data of 2-(hydroxy(3-nitrophenyl)methyl)cyclohexan-1-one (7b)

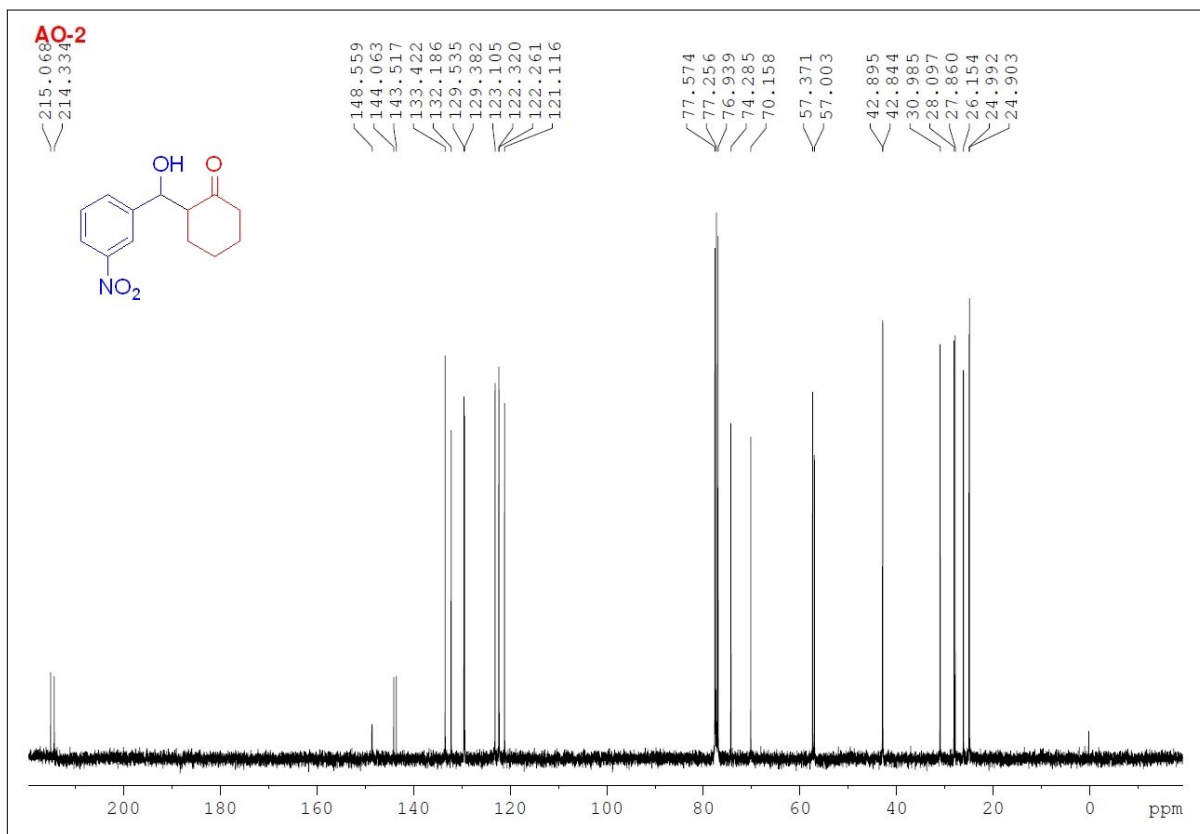

Figure S21: <sup>1</sup>H NMR data of 2-(hydroxy(2-nitrophenyl)methyl)cyclohexan-1-one (7c)

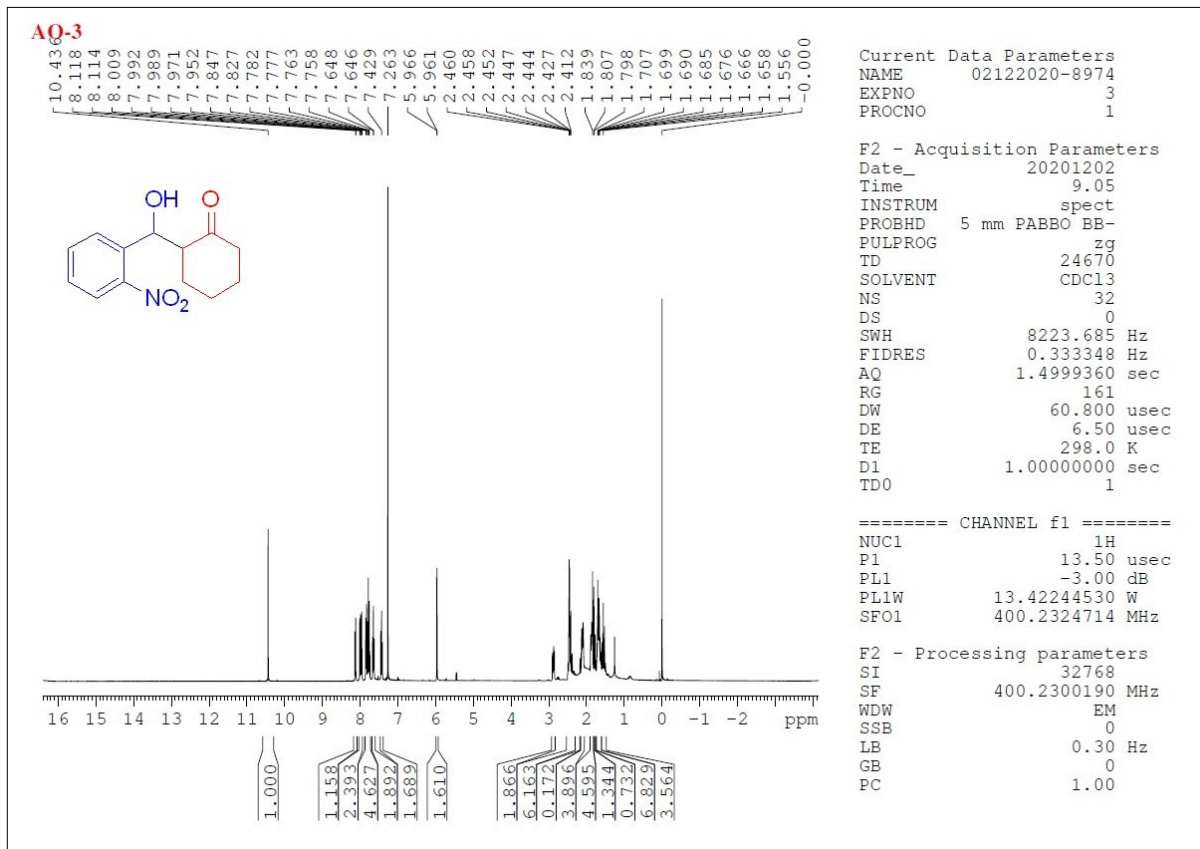

Figure S22: <sup>13</sup>C NMR data of 2-(hydroxy(2-nitrophenyl)methyl)cyclohexan-1-one (7c)

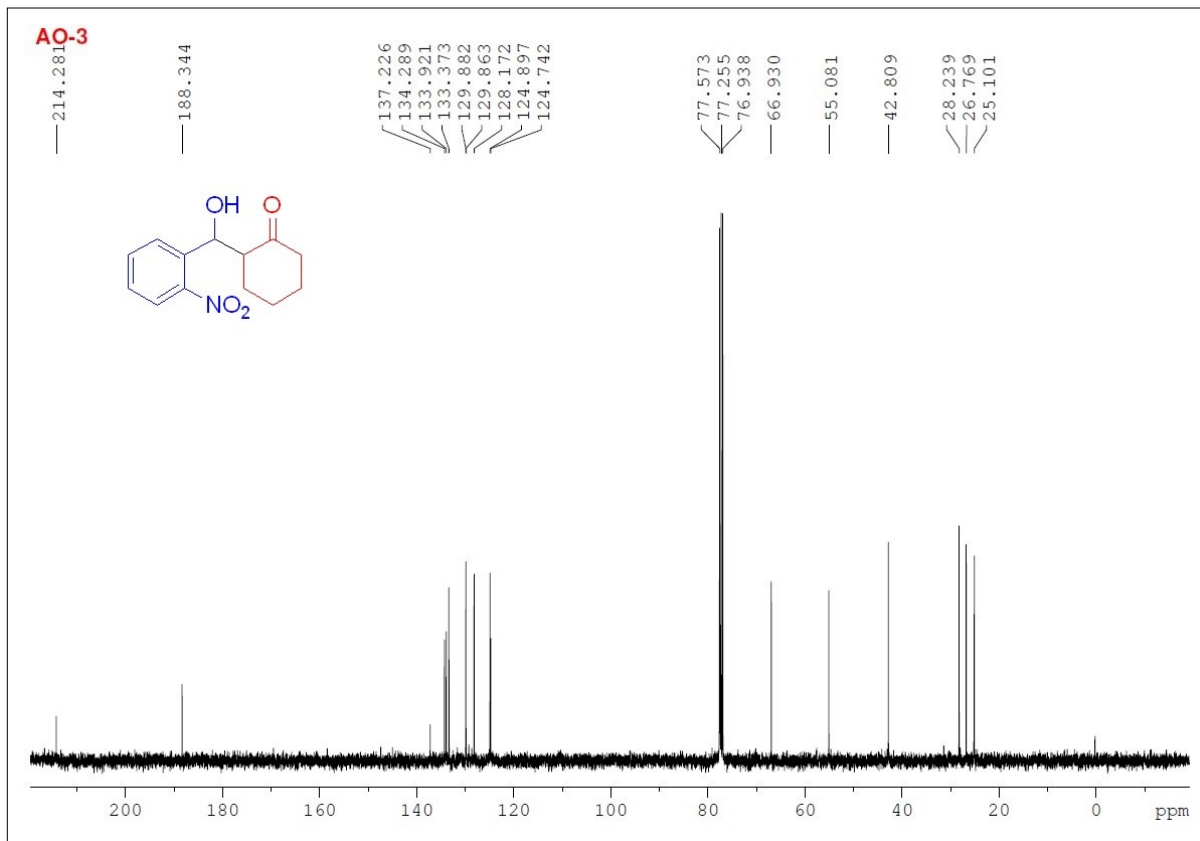

**Figure S23: <sup>1</sup>H NMR data of 2-((4-chlorophenyl)(hydroxy)methyl)cyclohexan-1-one (7d)**

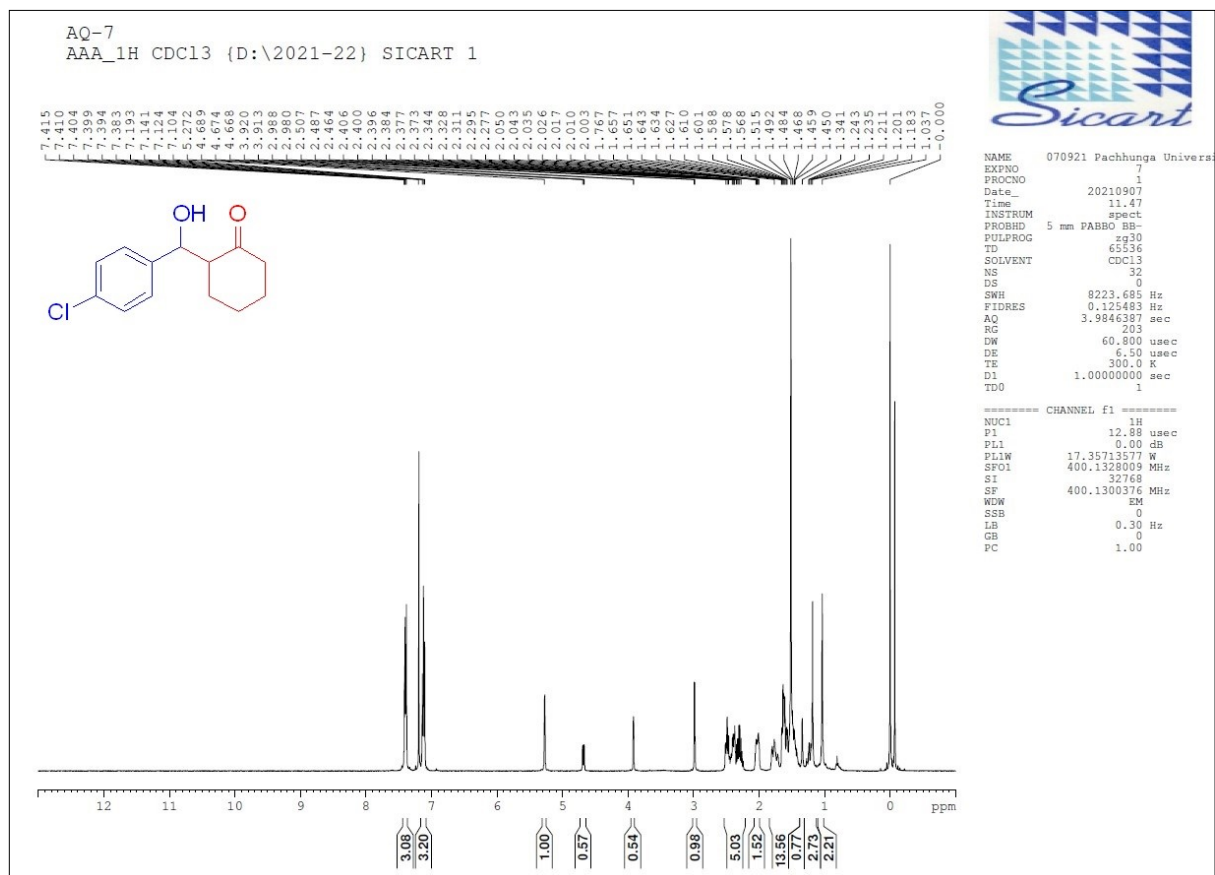

**Figure S24: <sup>13</sup>C NMR data of 2-((4-chlorophenyl)(hydroxy)methyl)cyclohexan-1-one (7d)**

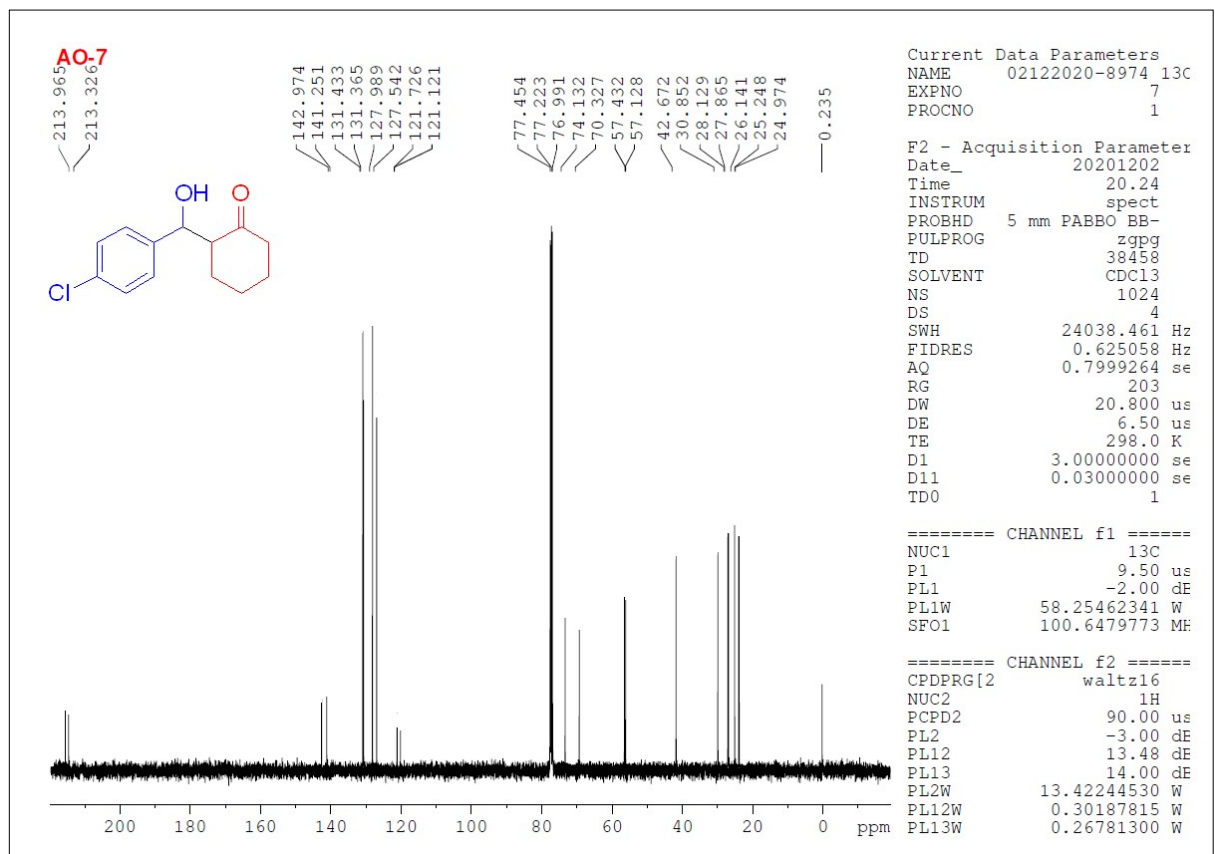

Figure S25: <sup>1</sup>H NMR data of 2-((3-chlorophenyl)(hydroxy)methyl)cyclohexan-1-one (7e)

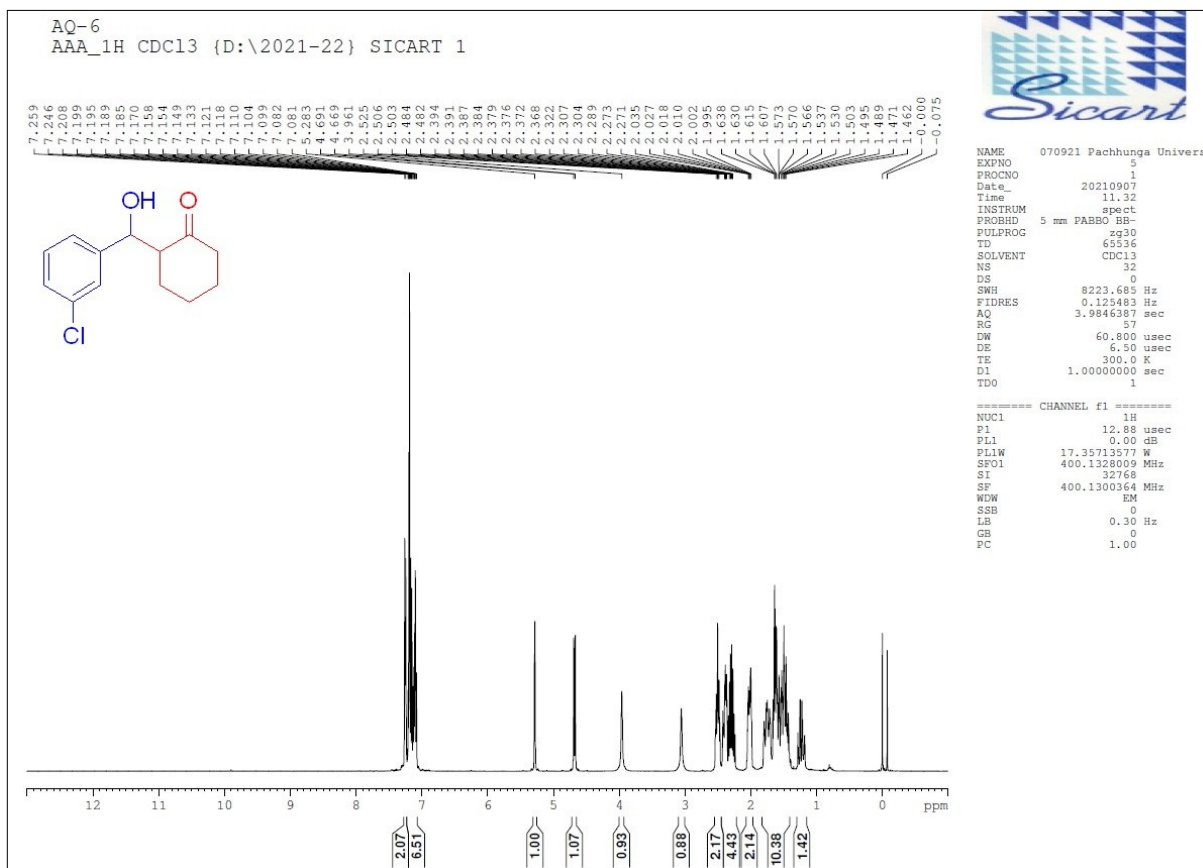

Figure S26: <sup>13</sup>C NMR data of 2-((3-chlorophenyl)(hydroxy)methyl)cyclohexan-1-one (7e)

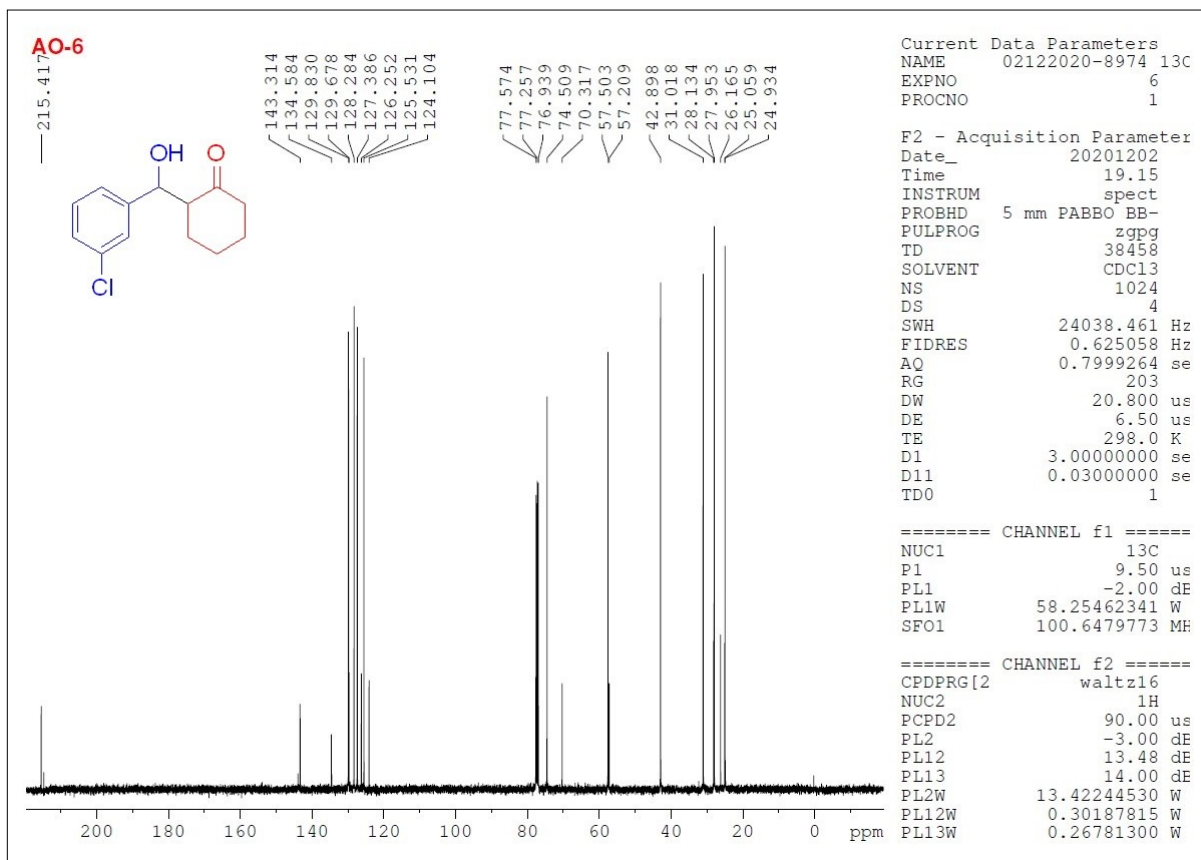

Figure S27: <sup>1</sup>H NMR data of 2-((2-chlorophenyl)(hydroxy)methyl)cyclohexan-1-one (7f)

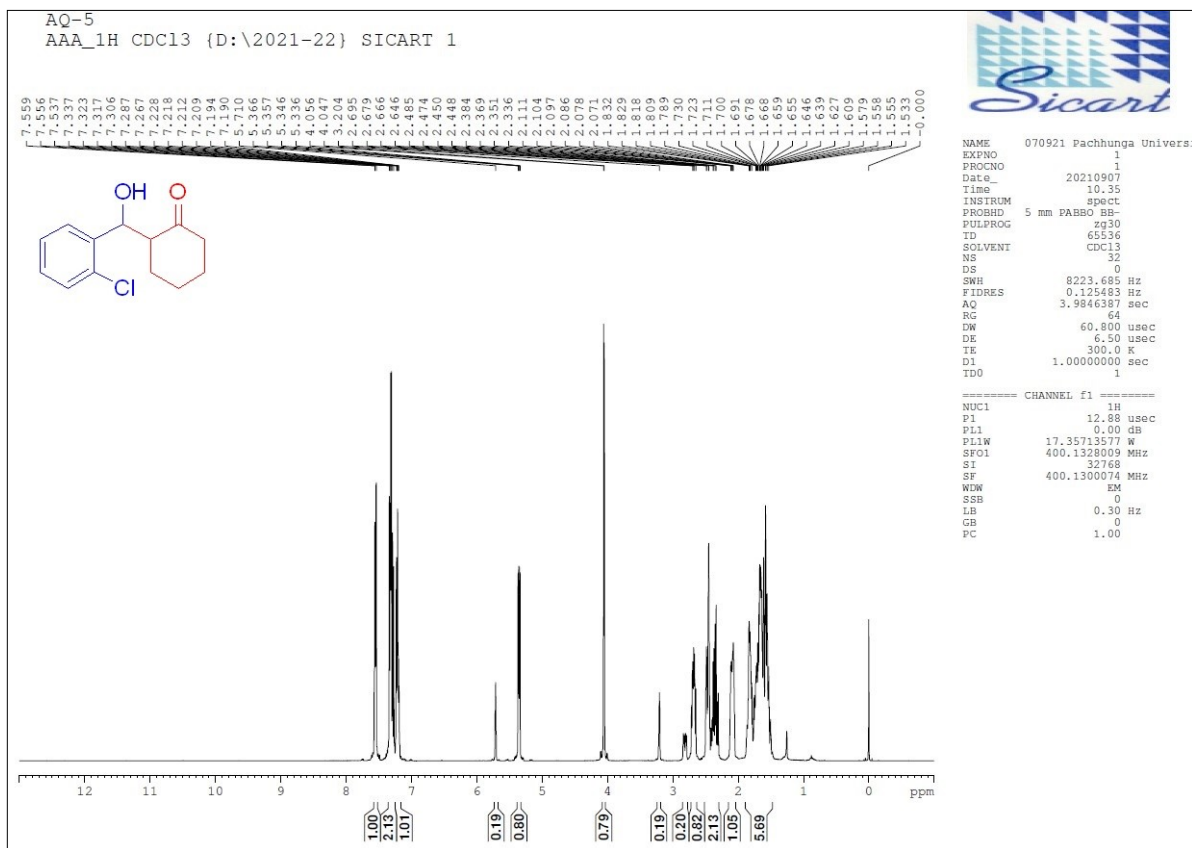

Figure S28: <sup>13</sup>C NMR data of 2-((2-chlorophenyl)(hydroxy)methyl)cyclohexan-1-one (7f)

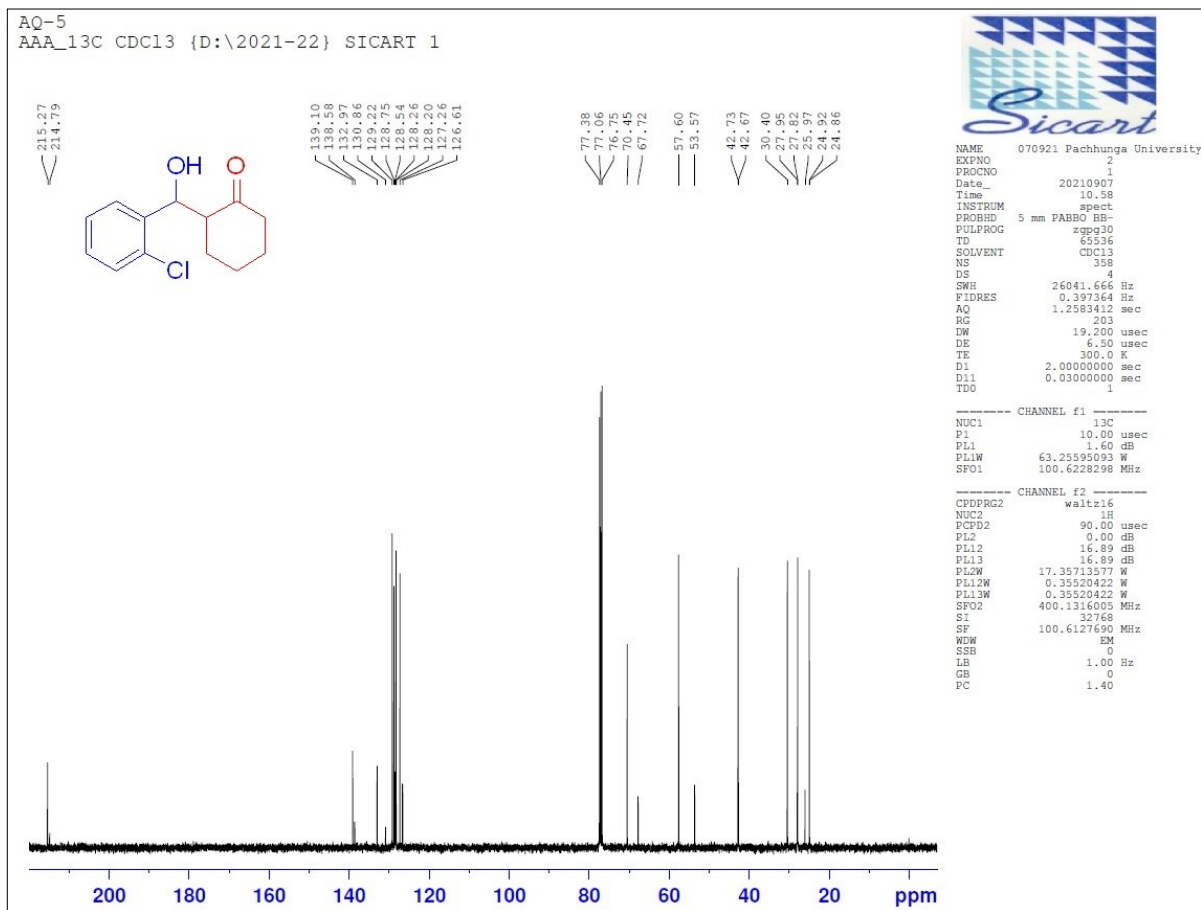

**Figure S29: <sup>1</sup>H NMR data of 2-((4-bromophenyl)(hydroxy)methyl)cyclohexan-1-one (7g)**

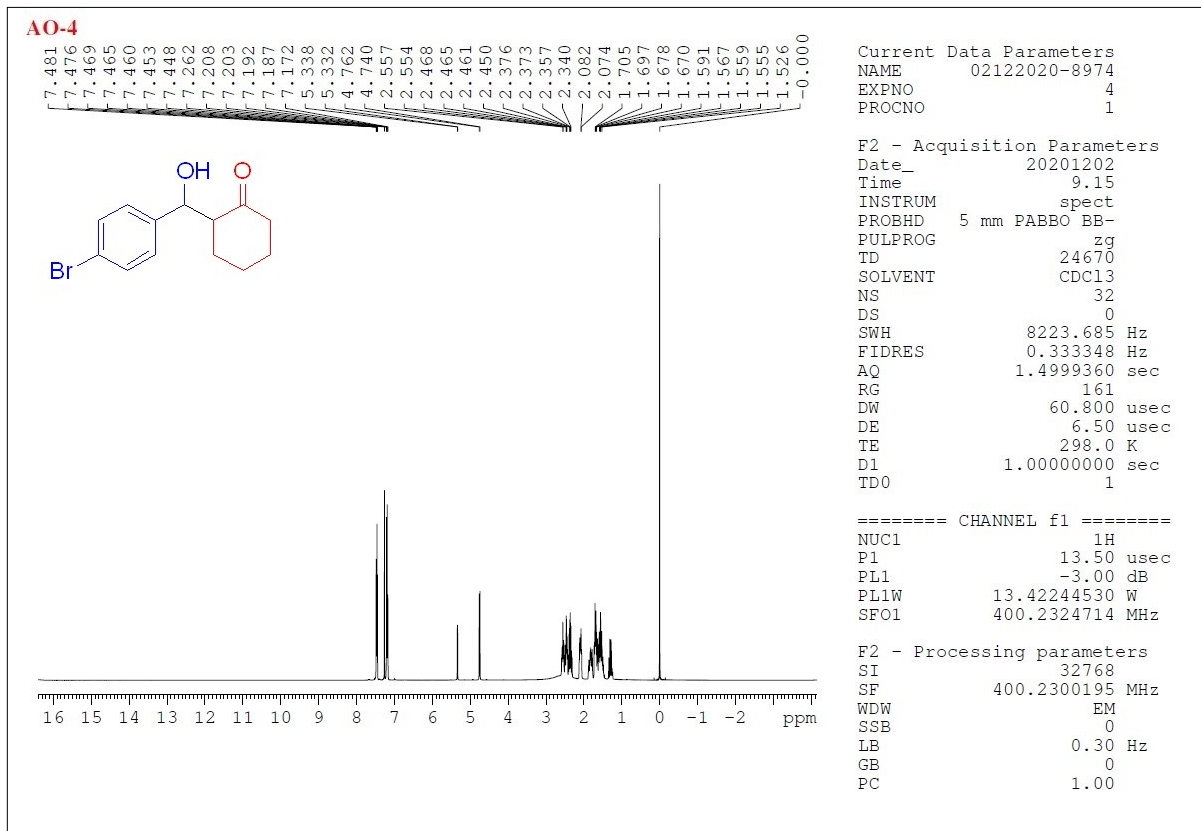

**Figure S30: <sup>13</sup>C NMR data of 2-((4-bromophenyl)(hydroxy)methyl)cyclohexan-1-one (7g)**

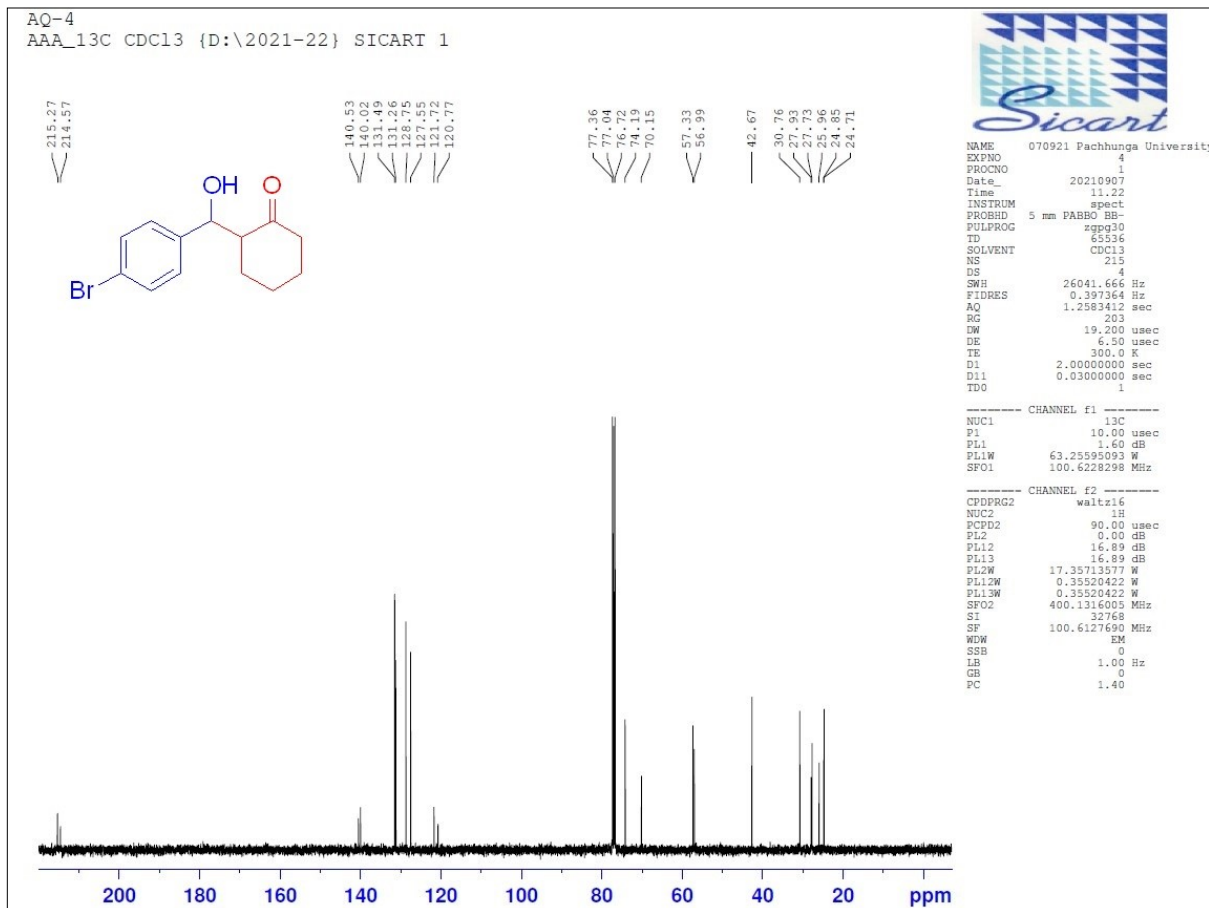

Figure S31: <sup>1</sup>H NMR data of 2-(hydroxy(phenyl)methyl)cyclohexan-1-one (7h)

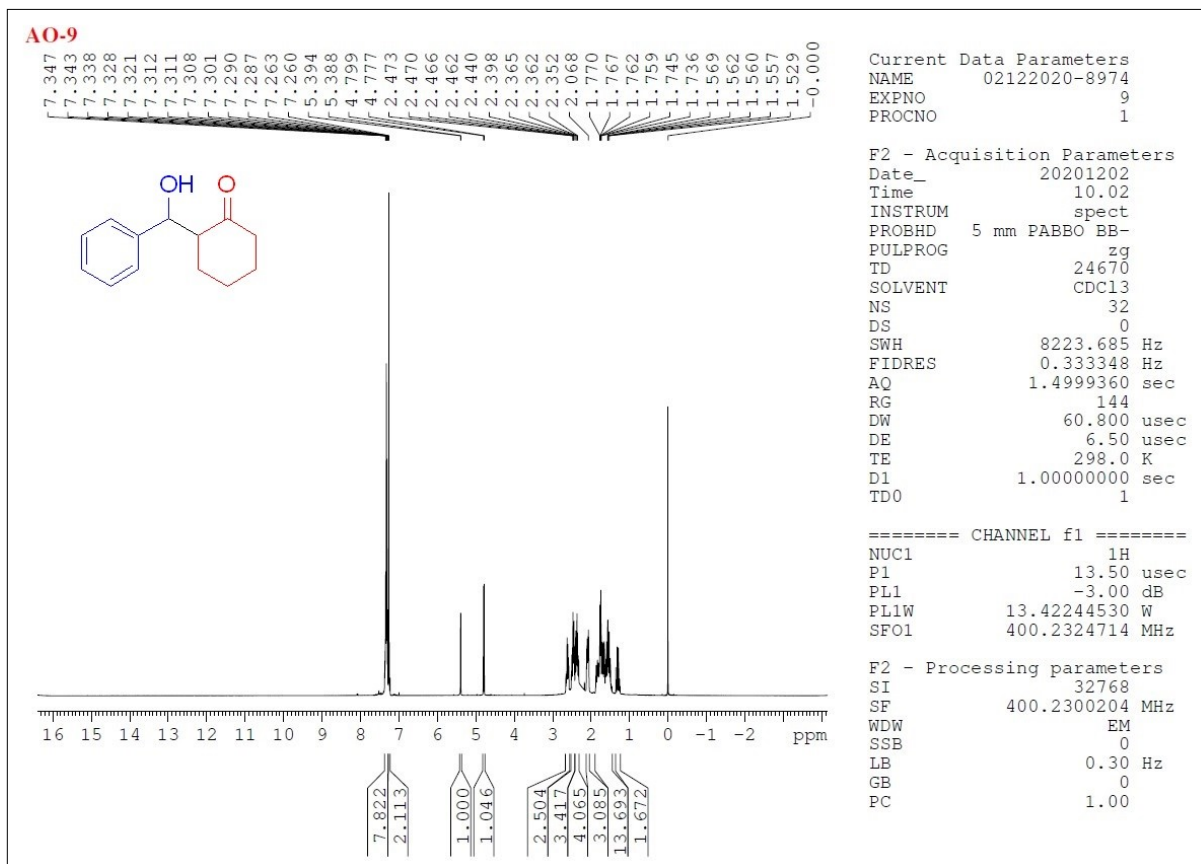

Figure S32: <sup>13</sup>C NMR data of 2-(hydroxy(phenyl)methyl)cyclohexan-1-one (7h)

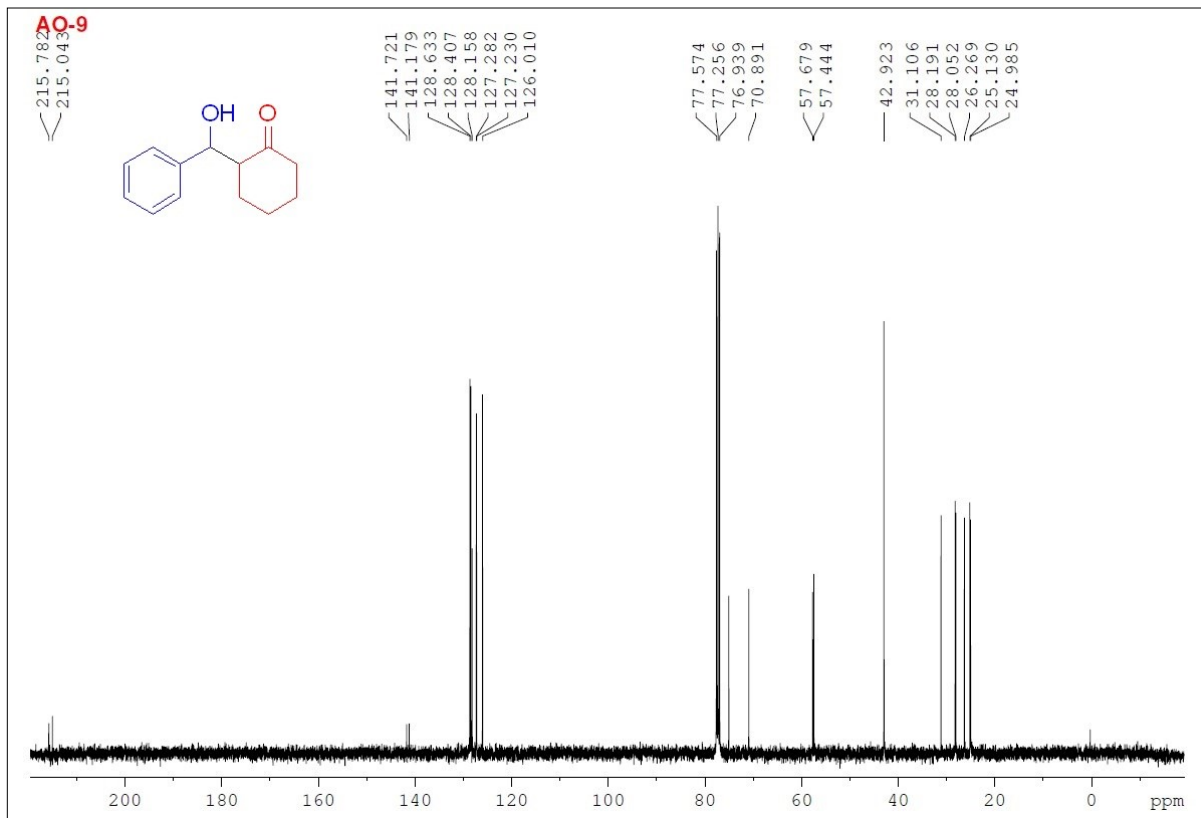



**Figure S33: <sup>1</sup>H NMR data of 2-(hydroxy(p-tolyl)methyl)cyclohexan-1-one (7i)**

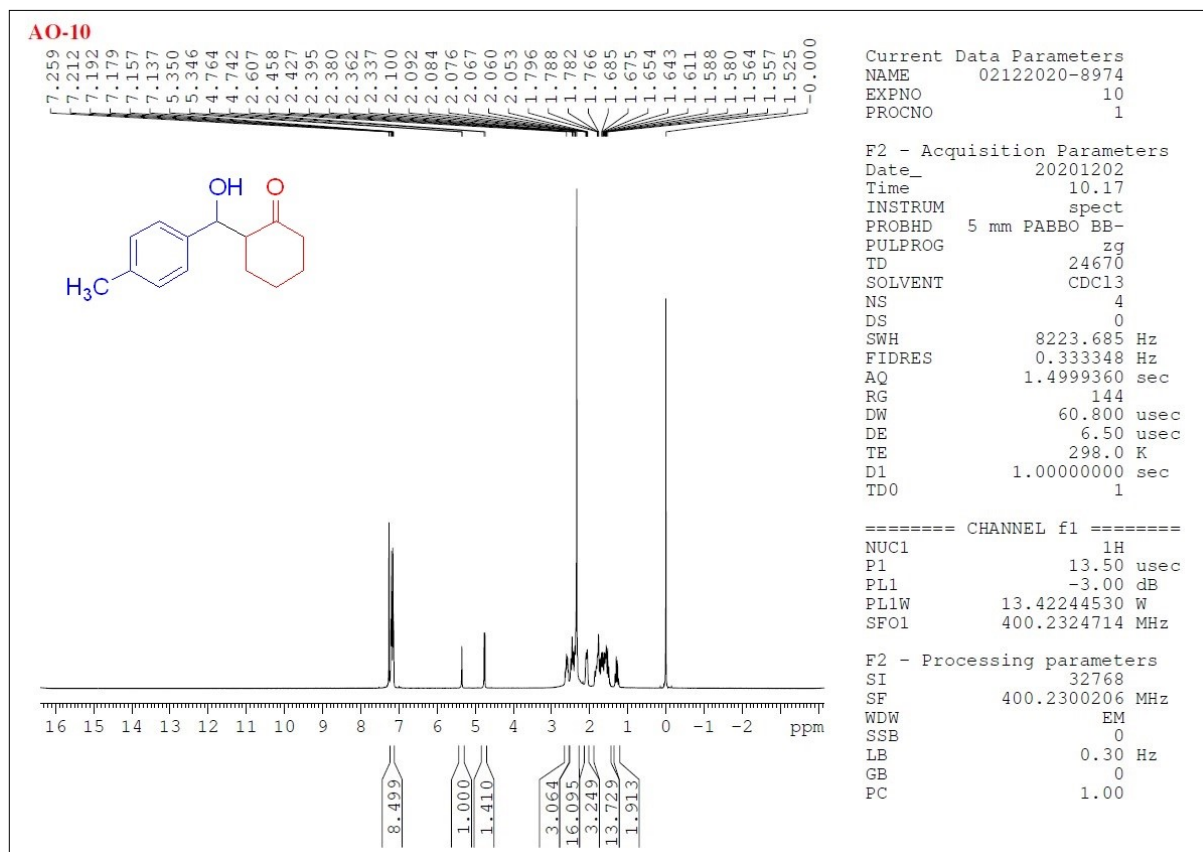

**Figure S34: <sup>13</sup>C NMR data of 2-(hydroxy(p-tolyl)methyl)cyclohexan-1-one (7i)**

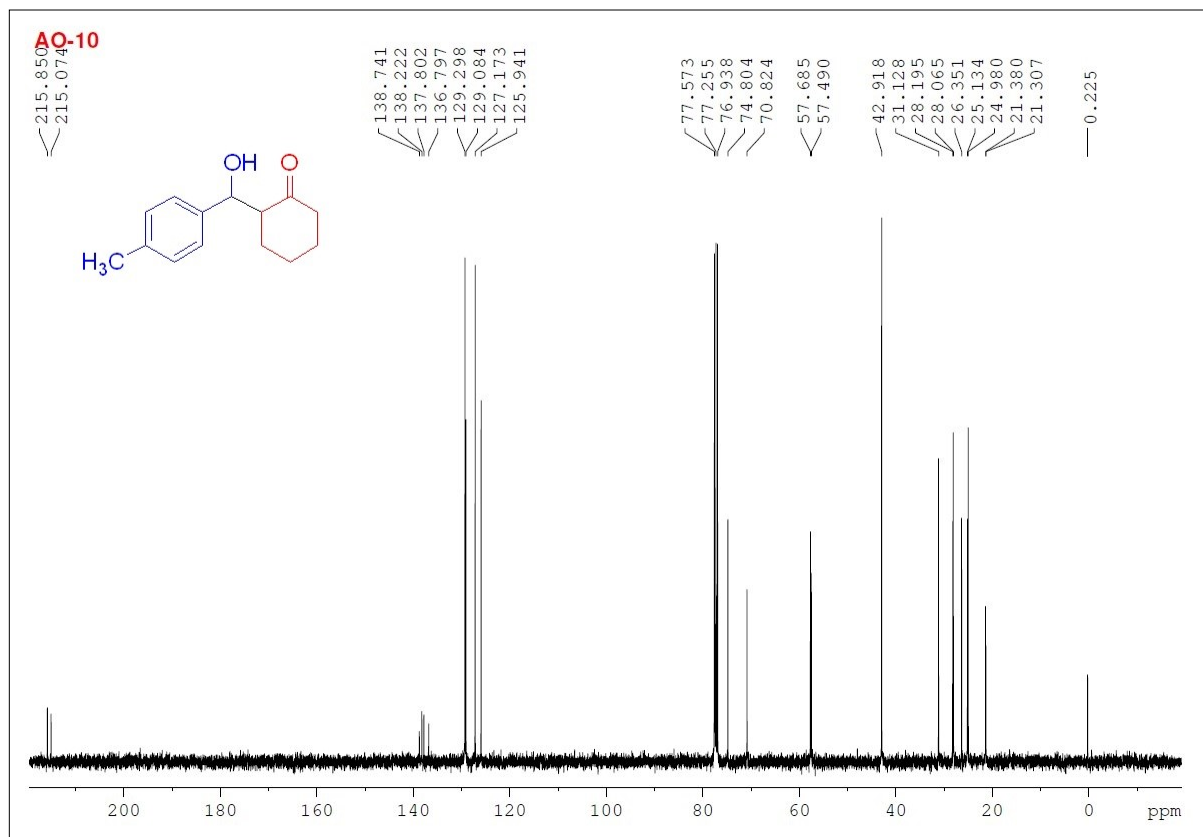

**Figure S35: <sup>1</sup>H NMR data of 2-(hydroxy(4-methoxyphenyl)methyl)cyclohexan-1-one (7j)**

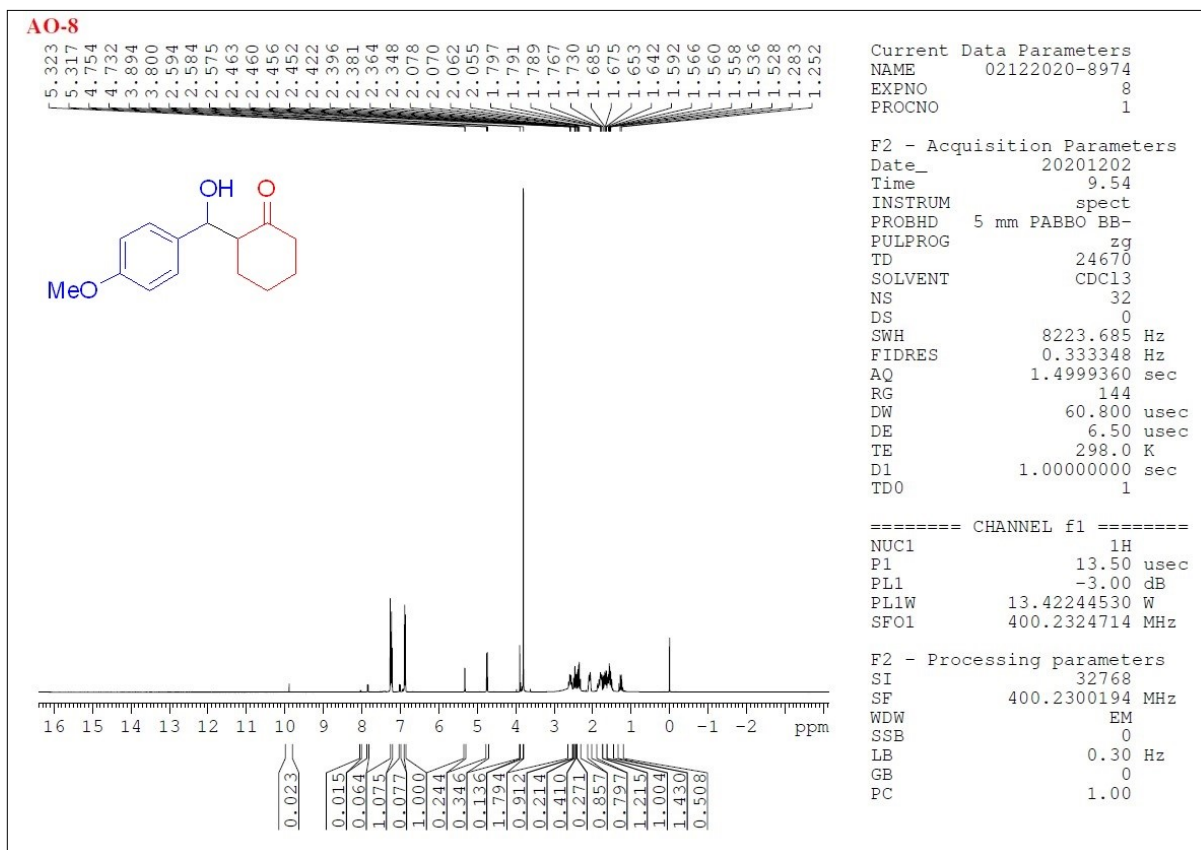

**Figure S36: <sup>13</sup>C NMR data of 2-(hydroxy(4-methoxyphenyl)methyl)cyclohexan-1-one (7j)**

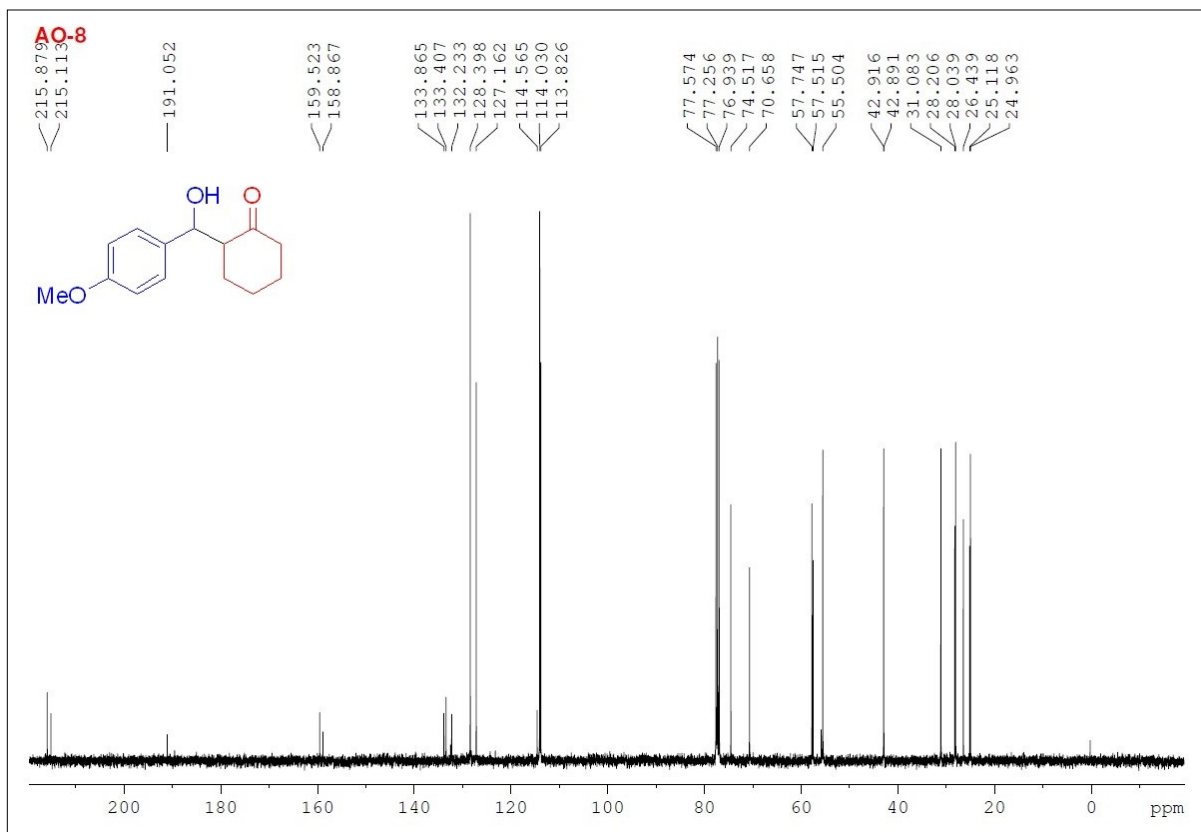

Figure S37: <sup>1</sup>H NMR data of 4-hydroxy-4-(4-nitrophenyl)butan-2-one (7k)

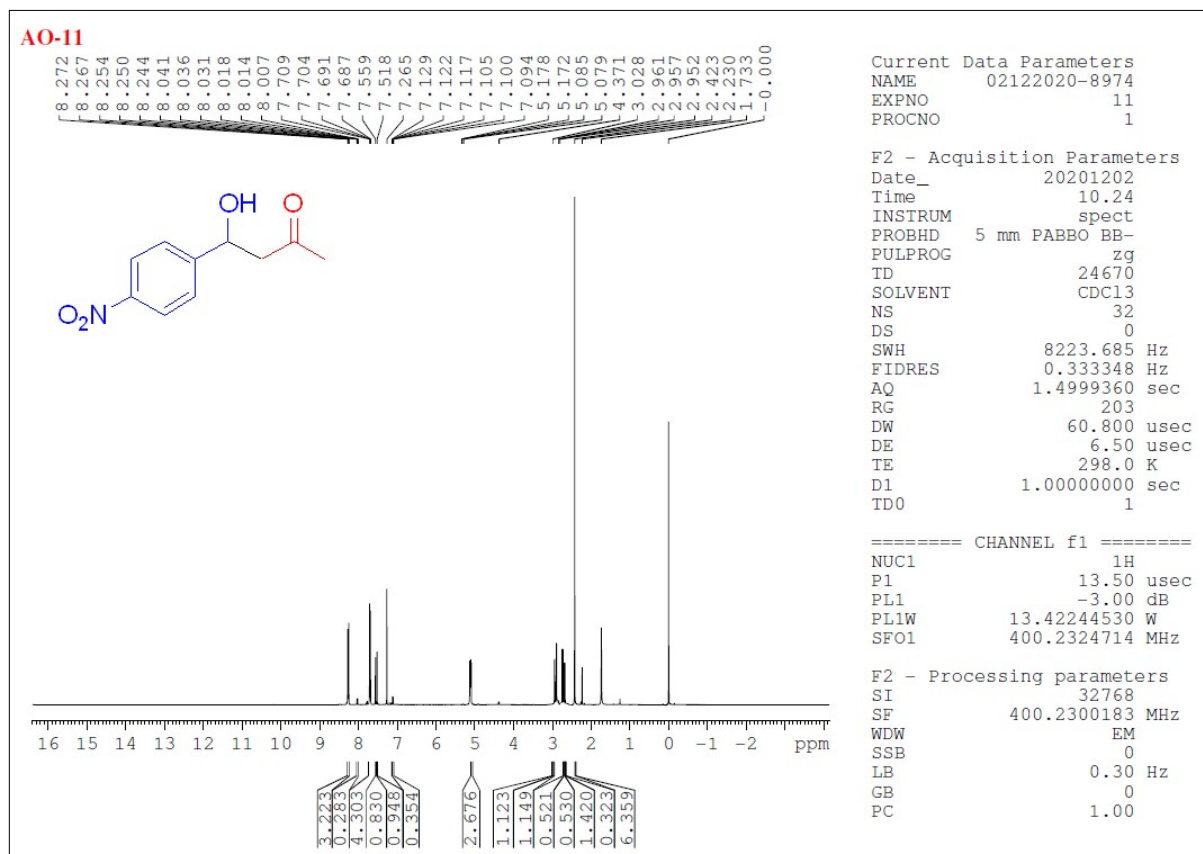

Figure S38: <sup>13</sup>C NMR data of 4-hydroxy-4-(4-nitrophenyl)butan-2-one (7k)

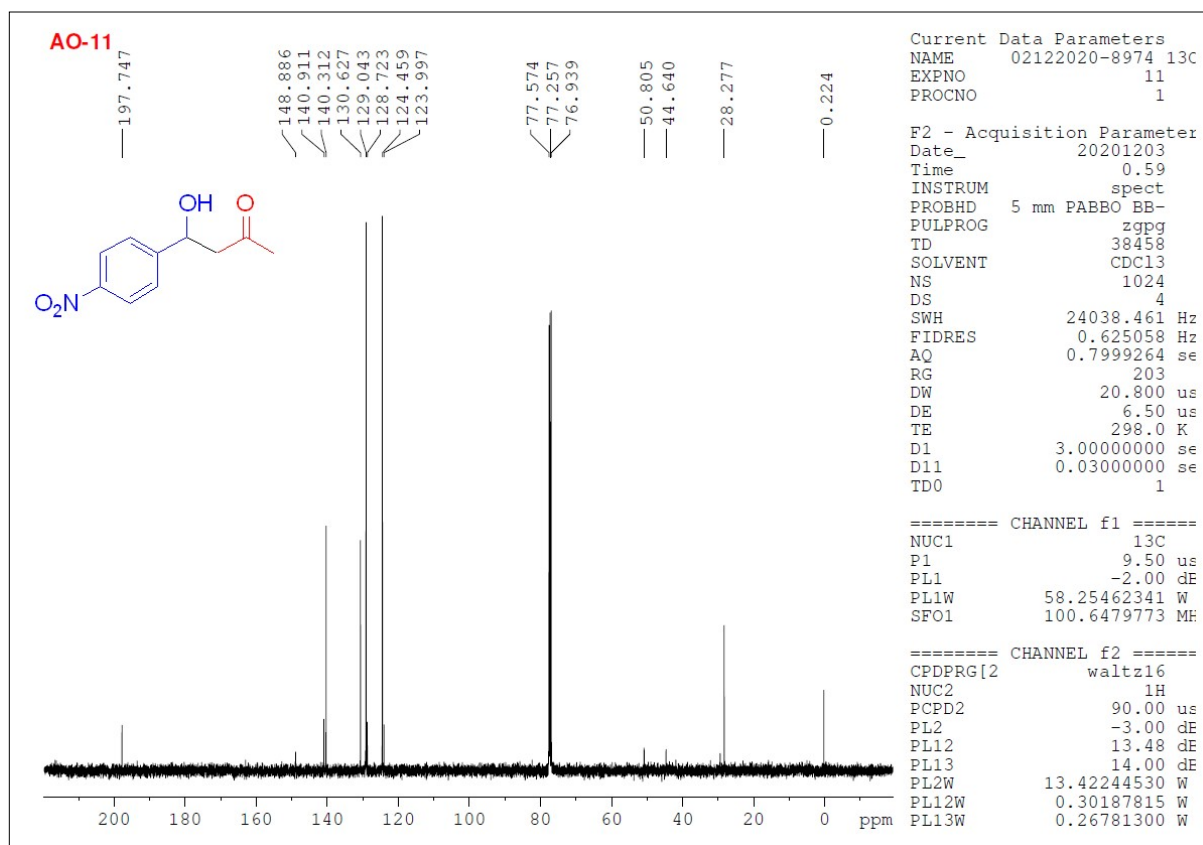

Figure S39: <sup>1</sup>H NMR data of 4-hydroxy-4-(3-nitrophenyl)butan-2-one (7l)

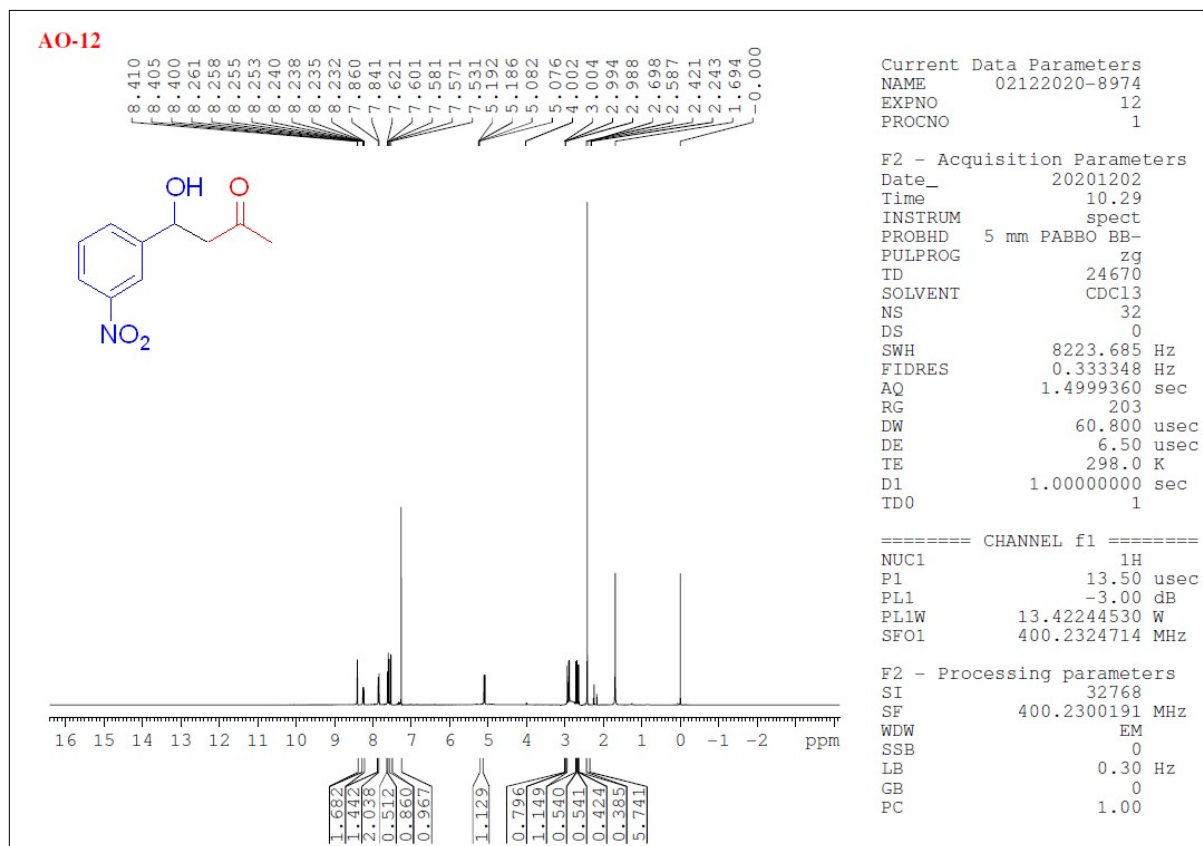

Figure S40: <sup>13</sup>C NMR data of 4-hydroxy-4-(3-nitrophenyl)butan-2-one (7l)

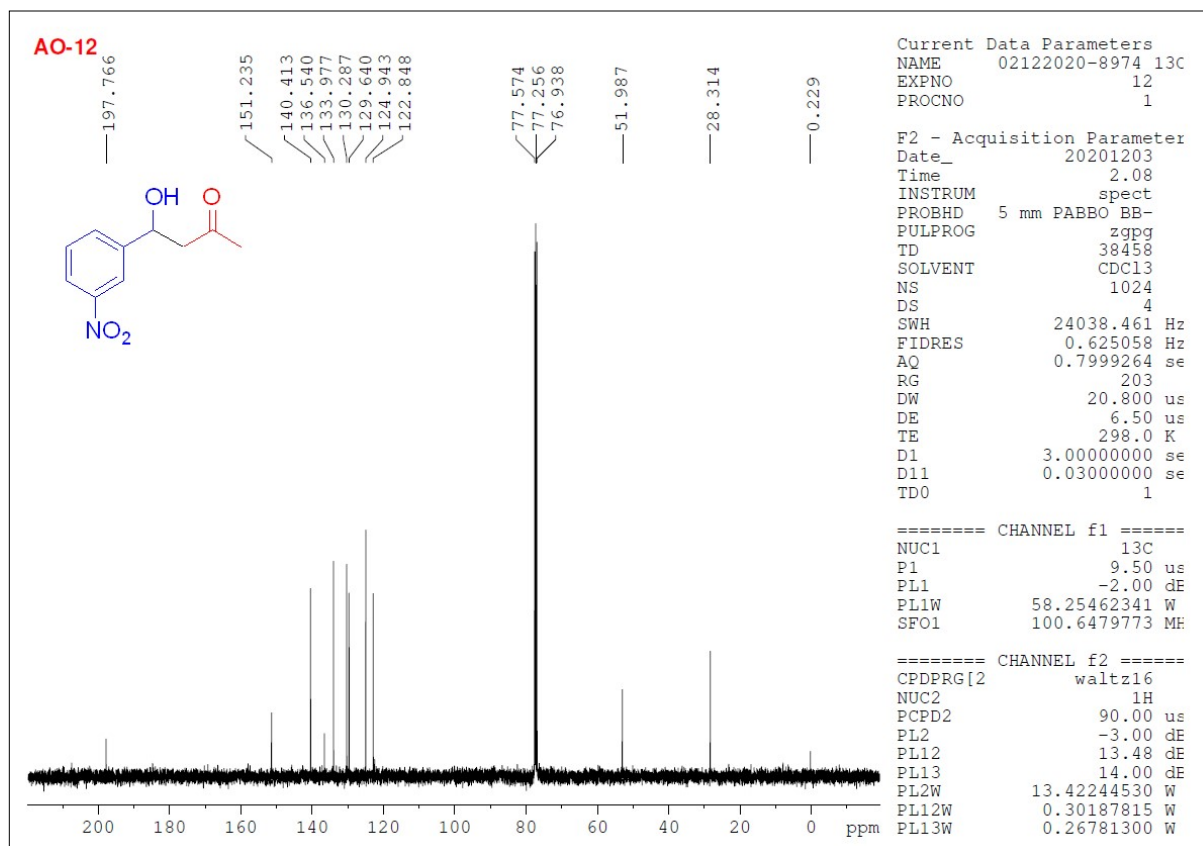

Figure S41: <sup>1</sup>H NMR data of 4-(4-chlorophenyl)-4-hydroxybutan-2-one (7m)

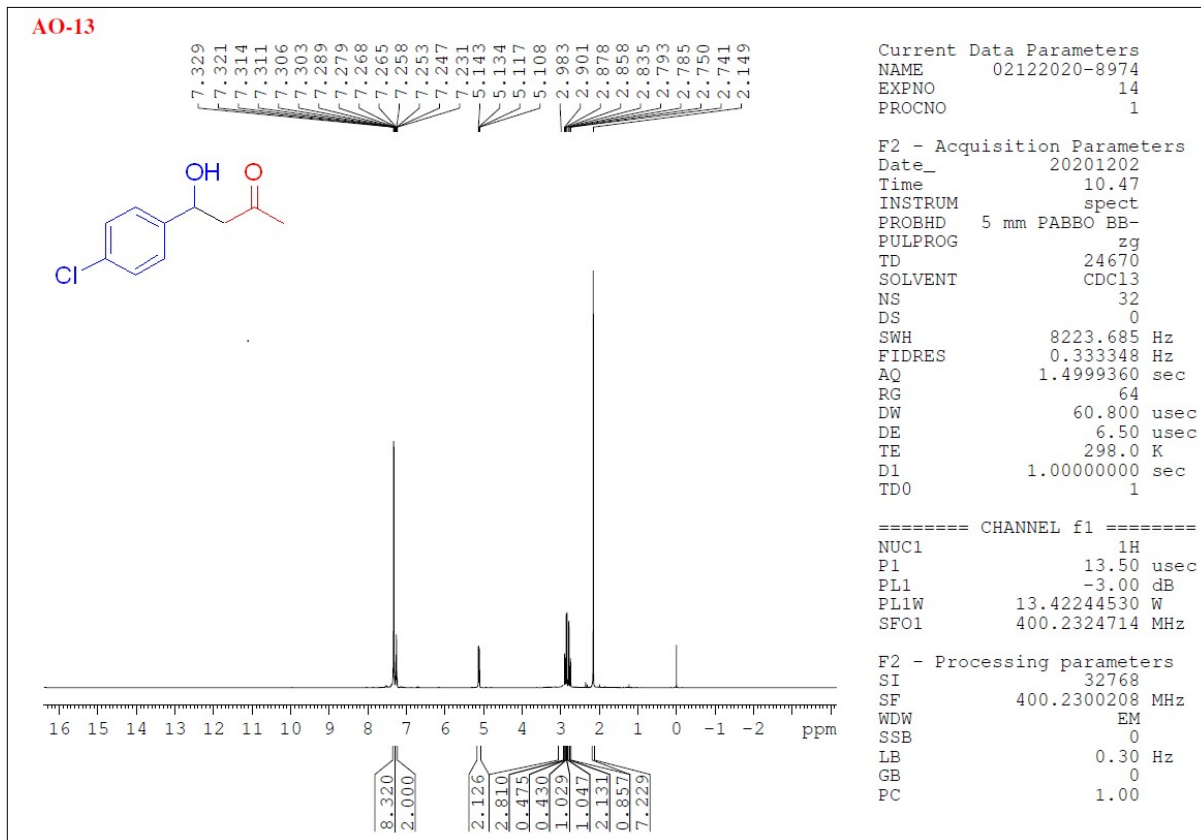

Figure S42: <sup>13</sup>C NMR data of 4-(4-chlorophenyl)-4-hydroxybutan-2-one (7m)

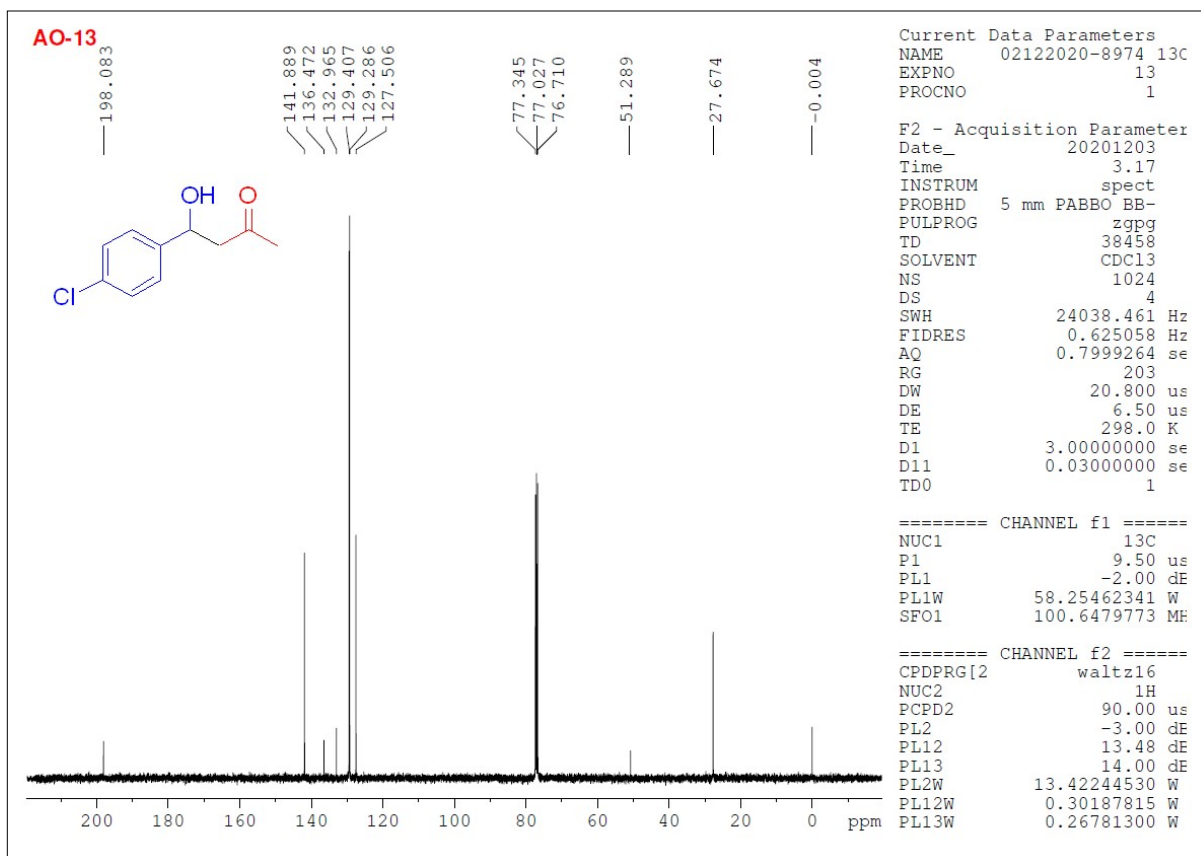

Figure S43: <sup>1</sup>H NMR data of 4-hydroxy-4-phenylbutan-2-one (7n)

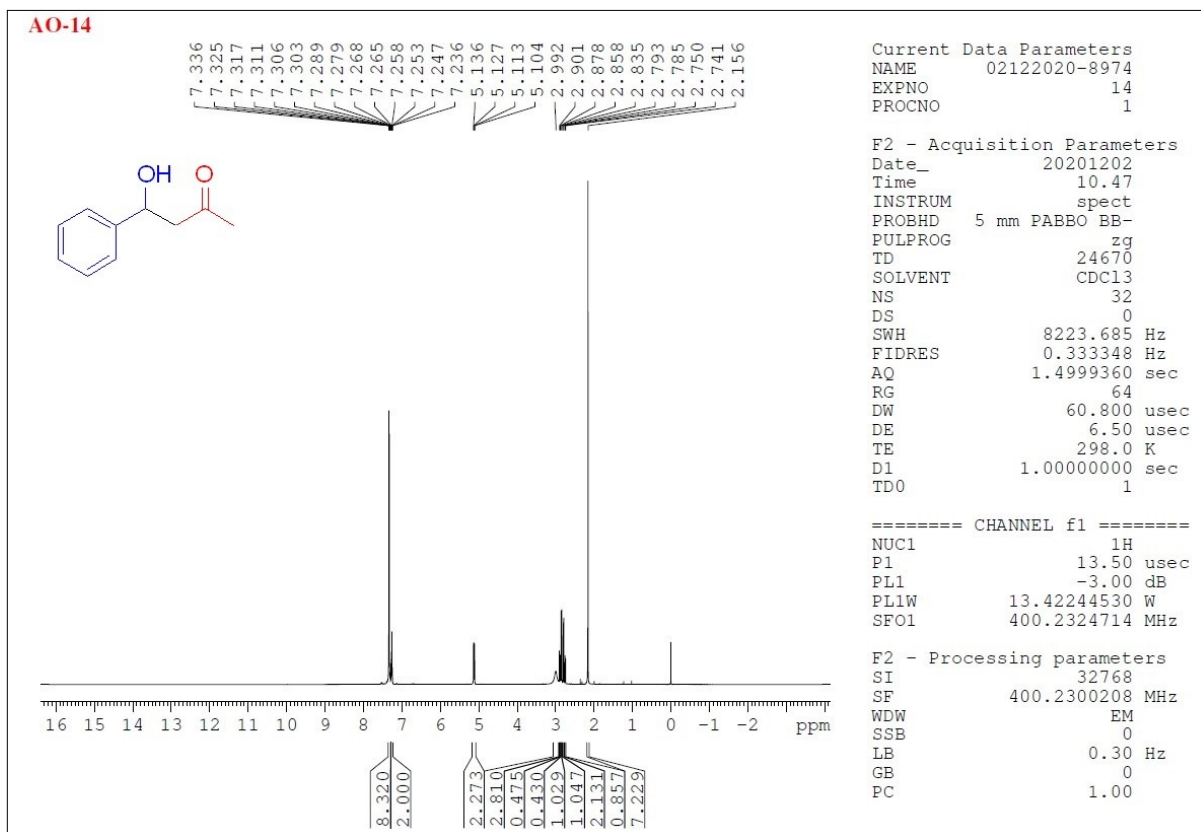

Figure S44: <sup>13</sup>C NMR data of 4-hydroxy-4-phenylbutan-2-one (7n)

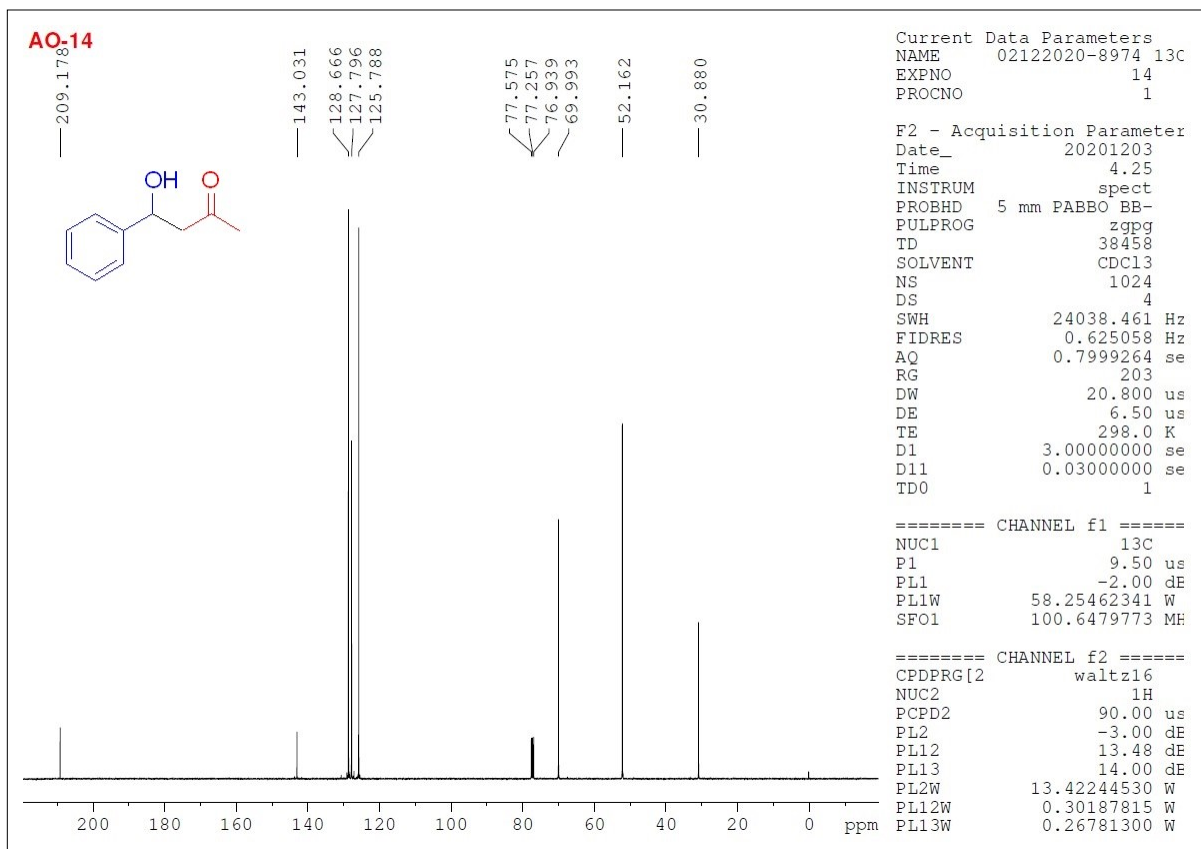

Figure S45: <sup>1</sup>H NMR data of 4-hydroxy-4-(p-tolyl)butan-2-one (7o)

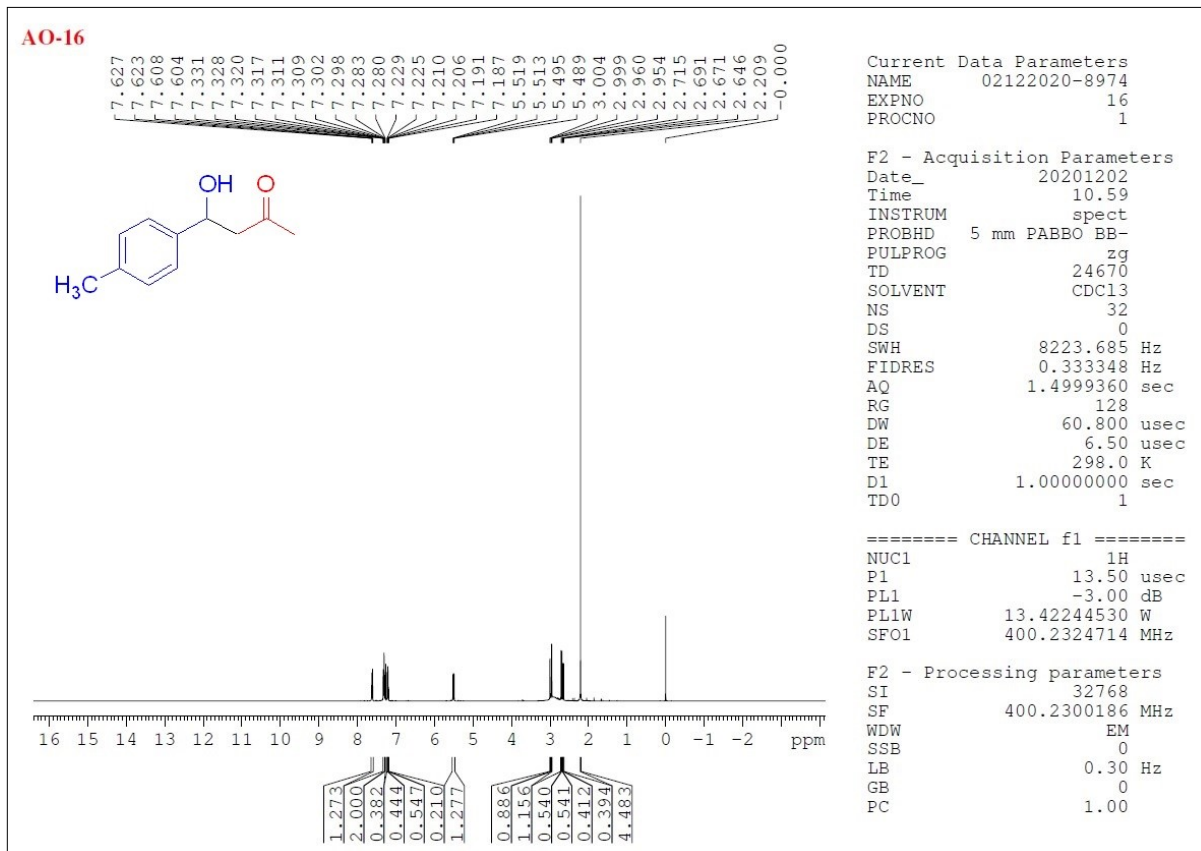

Figure S46: <sup>13</sup>C NMR data of 4-hydroxy-4-(p-tolyl)butan-2-one (7o)

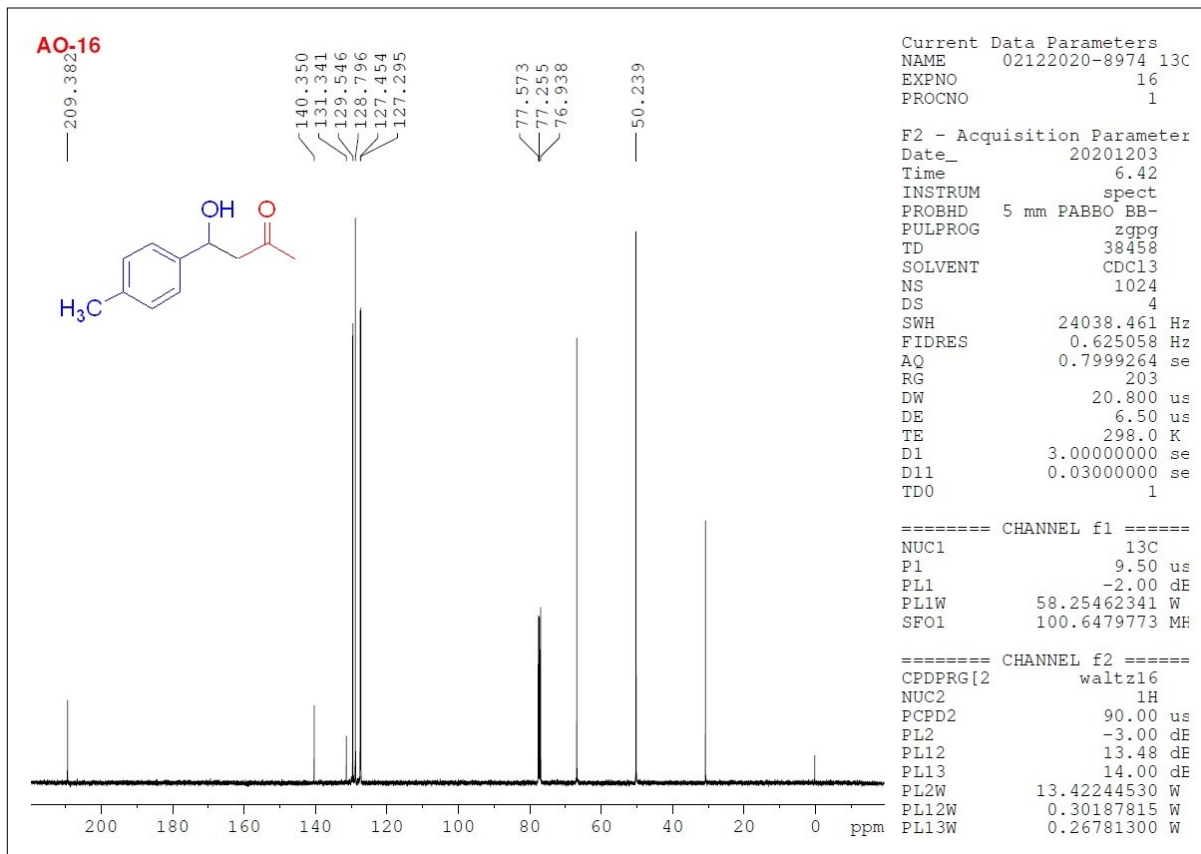

Figure S47: <sup>1</sup>H NMR data of 4-hydroxy-4-(4-methoxyphenyl)butan-2-one (7p)

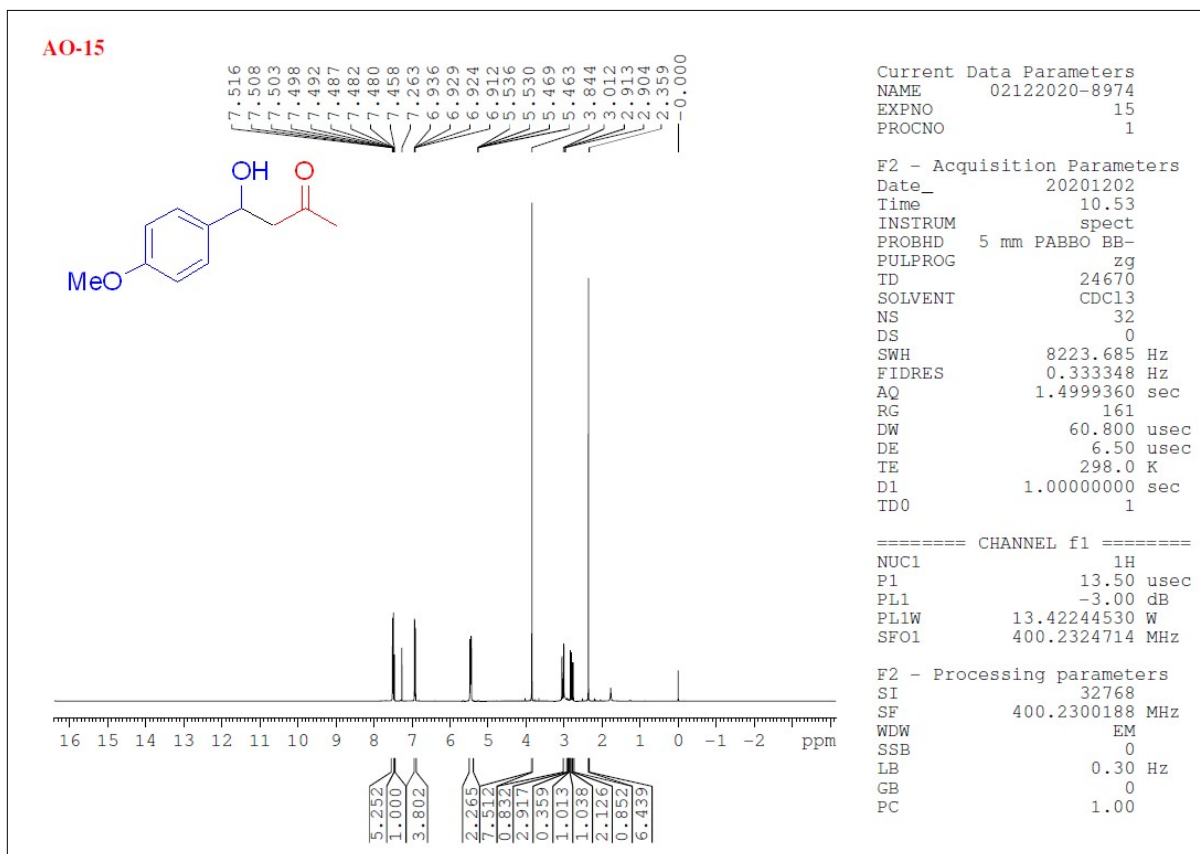

Figure S48: <sup>13</sup>C NMR data of 4-hydroxy-4-(4-methoxyphenyl)butan-2-one (7p)

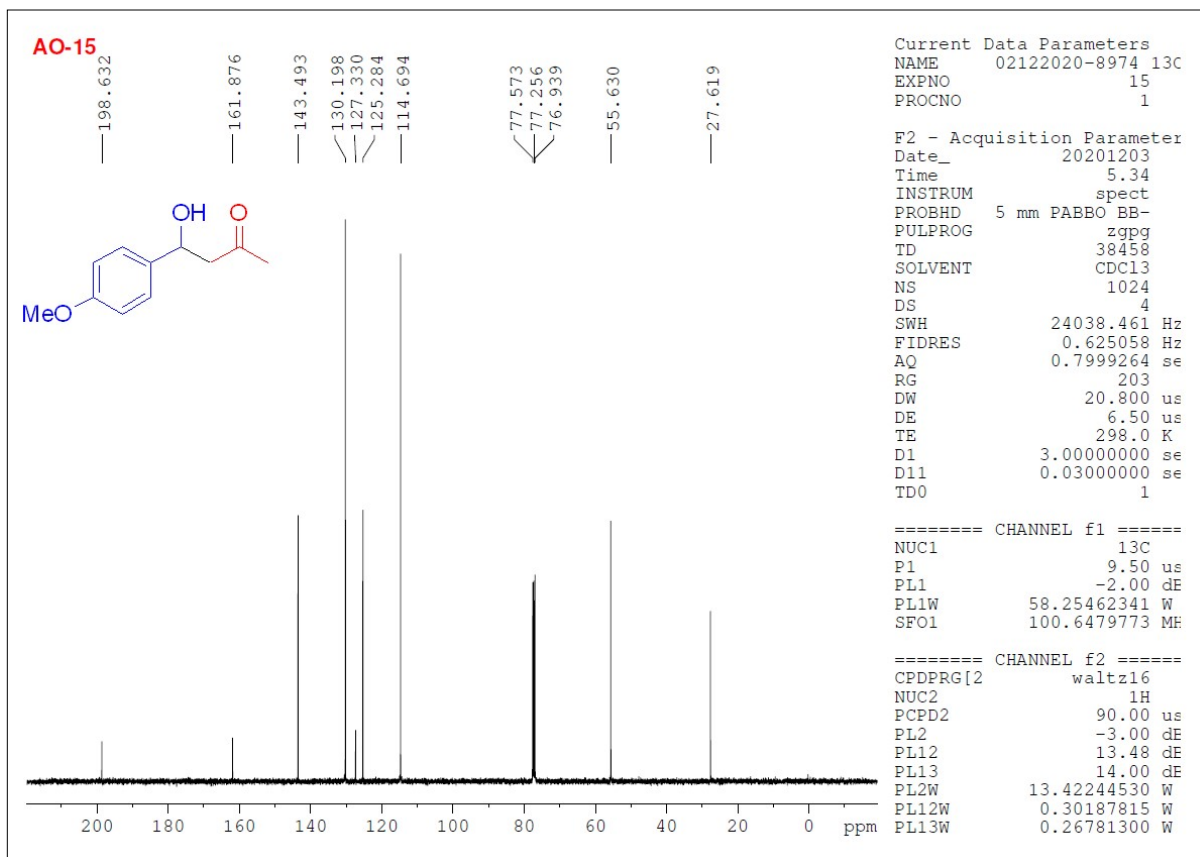



**Figure S49: <sup>1</sup>H NMR data of 3-hydroxy-3-(4-nitrophenyl)-1-phenylpropan-1-one (7q)**

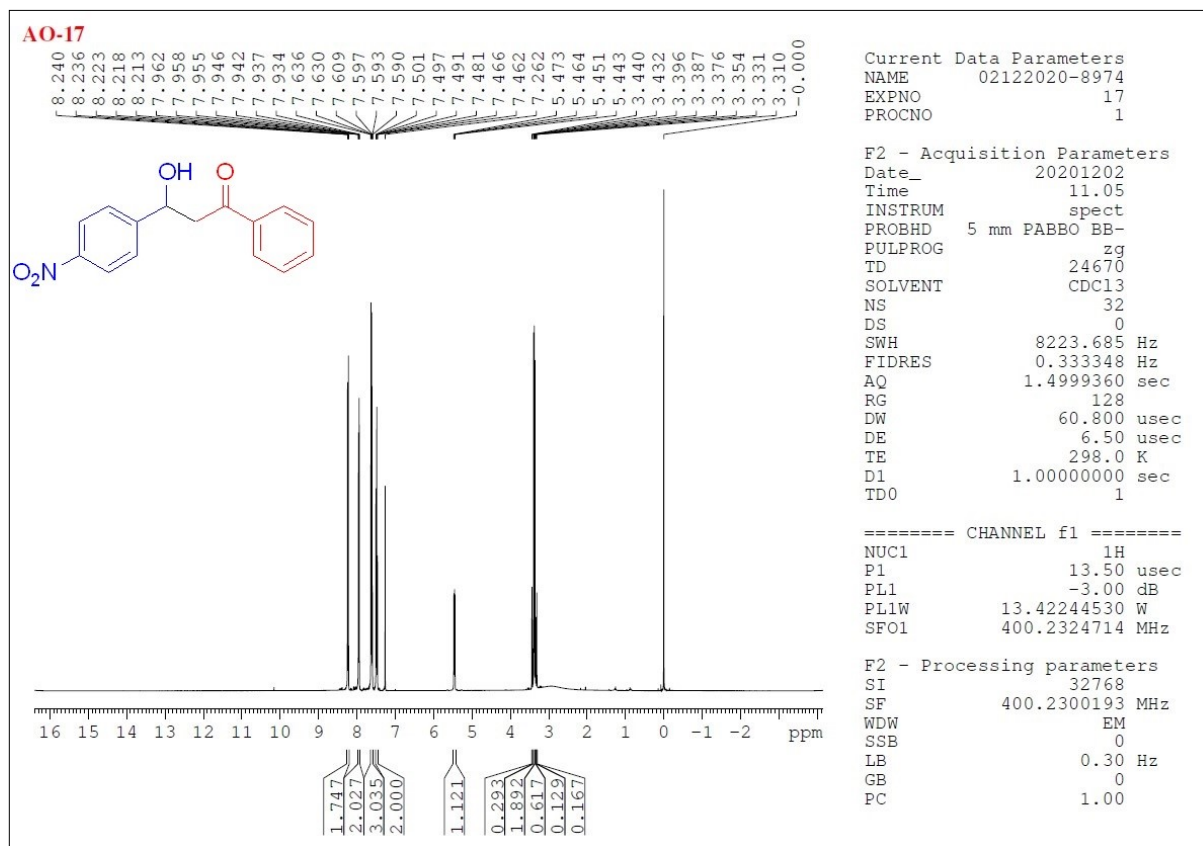

**Figure S50: <sup>13</sup>C NMR data of 3-hydroxy-3-(4-nitrophenyl)-1-phenylpropan-1-one (7q)**

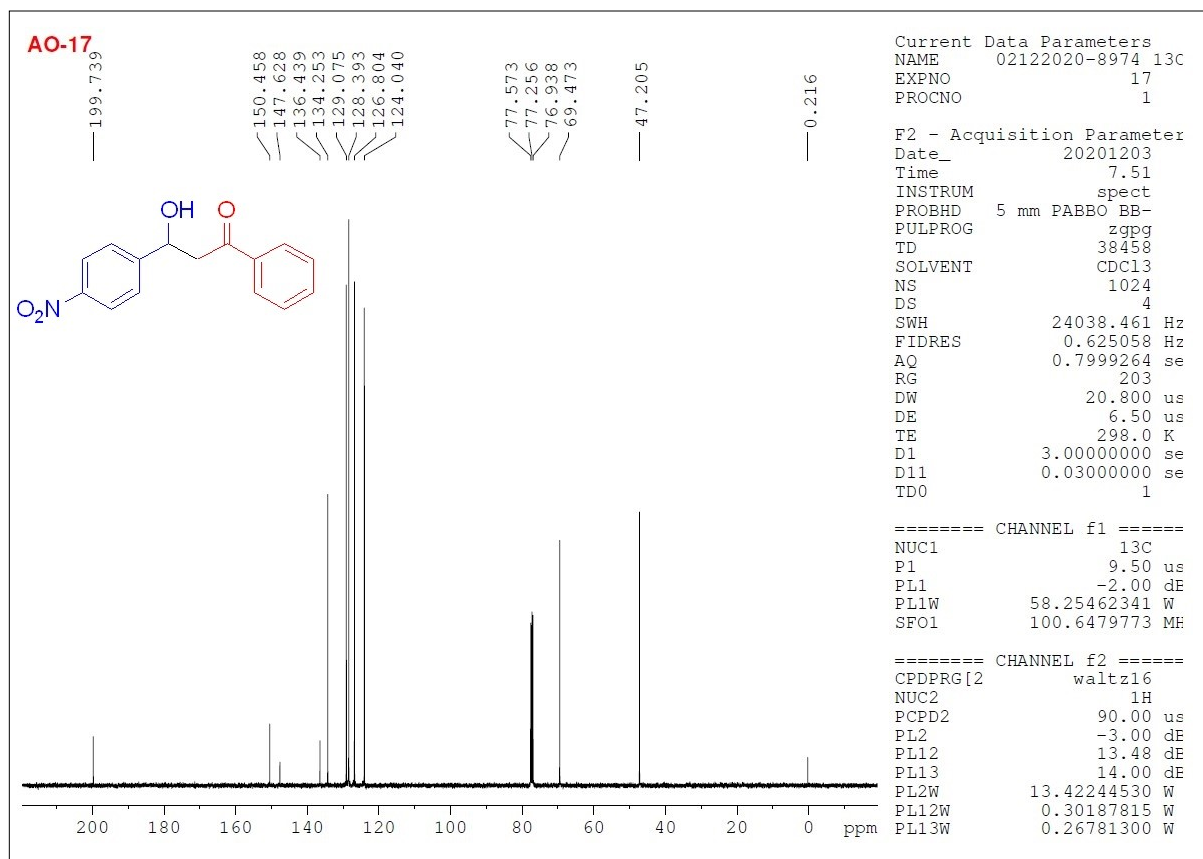

Figure S51: <sup>1</sup>H NMR data of 3-hydroxy-3-(3-nitrophenyl)-1-phenylpropan-1-one (7r)

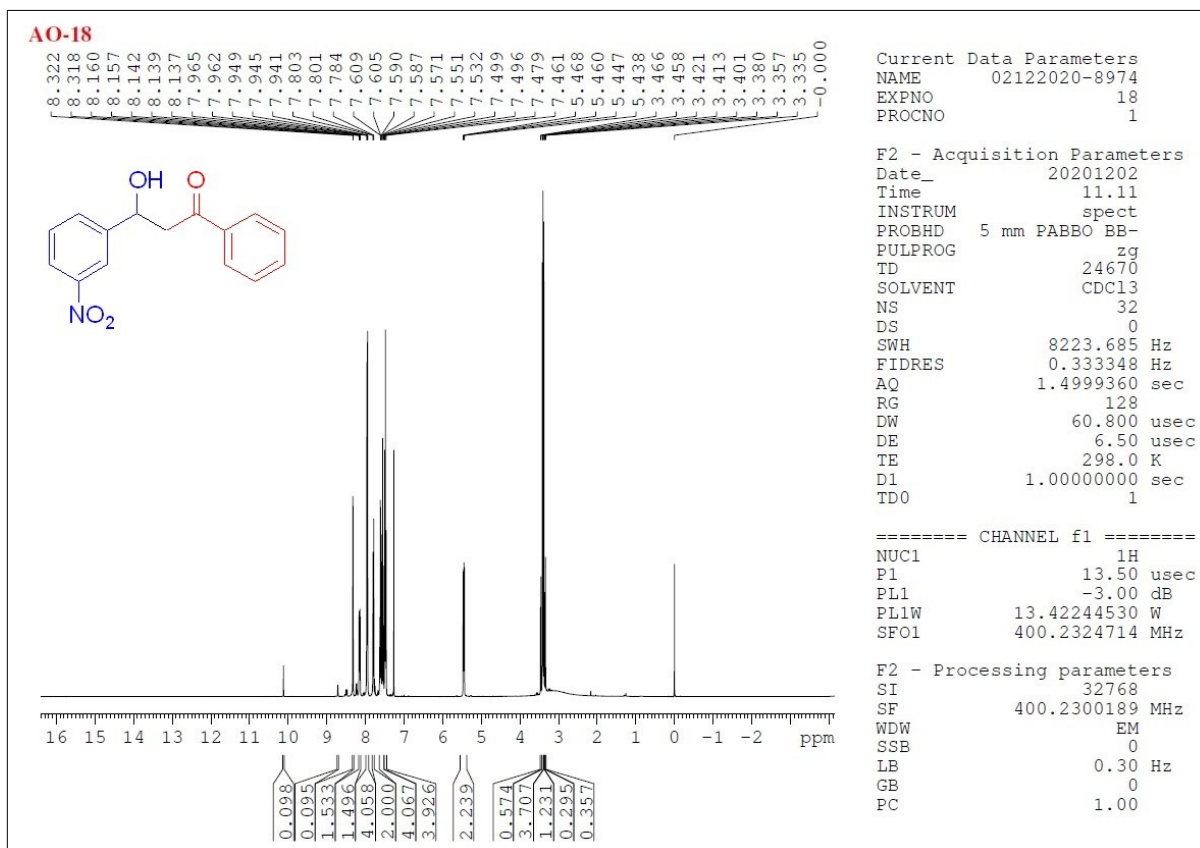

Figure S52: <sup>13</sup>C NMR data of 3-hydroxy-3-(3-nitrophenyl)-1-phenylpropan-1-one (7r)

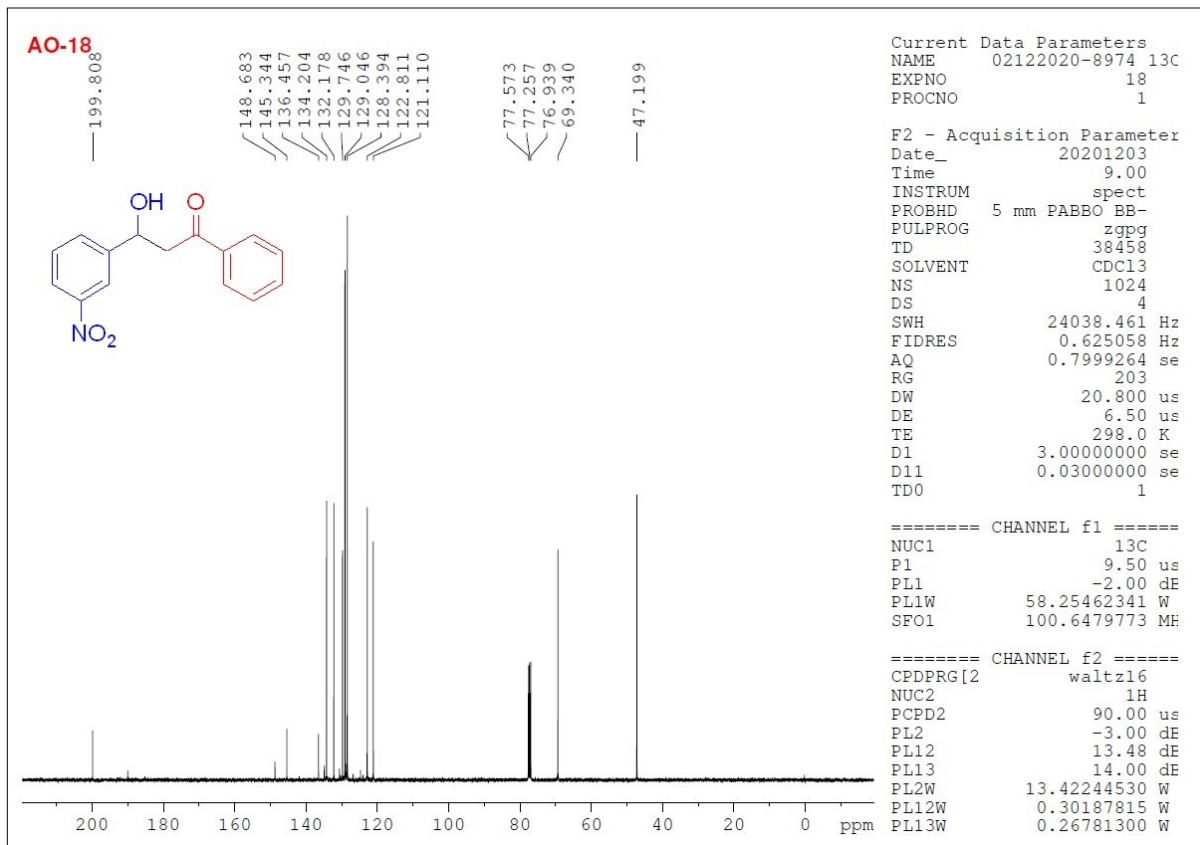

Supplement: d1nj03225a1.pdf [file d1nj03225a1.pdf]
